# Supplementary material for: Rapid and Inexpensive Whole-Genome Genotyping-by-Sequencing for Crossover Localization and Fine-Scale Genetic Mapping
Source: PubMed Central journal article supplement (PMC4349092; doi:10.1534/g3.114.016501), 2015-01-13
Supplement: supp_g3.114.016501_016501SI.pdf [file supp_g3.114.016501_016501SI.pdf]

## **Rapid and inexpensive whole-genome genotyping-by-sequencing for crossover localization and fine-scale genetic mapping**

Beth A. Rowan<sup>§\*</sup>, Vipul Patel<sup>†\*</sup>, Detlef Weigel<sup>§</sup>, and Korbinian Schneeberger<sup>†</sup>

<sup>§</sup>Department of Molecular Biology, Max Planck Institute for Developmental Biology, Tübingen, Germany

<sup>†</sup>Department of Developmental Biology, Max Planck Institute for Plant Breeding Research, Cologne, Germany

\*these authors contributed equally to this work

The short read sequence data for this manuscript have been deposited in the National Center for Biotechnology Information Sequence Read Archive under accession number PRJNA268060.

### Corresponding author

Detlef Weigel  
Department of Molecular Biology  
Max Planck Institute for Developmental Biology  
Spemannstrasse 35  
72076 Tübingen  
Germany

Phone: +49 7071 601 1411  
email: [weigel@weigelworld.org](mailto:weigel@weigelworld.org)

**DOI: 10.1534/g3.114.016501**

**Table S1 Adapter index sequences.**

| Index Number | Sequence | Index Number | Sequence | Index Number | Sequence | Index Number | Sequence |
|--------------|----------|--------------|----------|--------------|----------|--------------|----------|
| 1            | ACGTAGCT | 25           | AGATCGCA | 49           | GATAGACA | 73           | AATGTTGC |
| 2            | TACGTCAG | 26           | AGCAGGAA | 50           | GCCACATA | 74           | ACACGACC |
| 3            | CGTCGATA | 27           | AGTCACTA | 51           | GCGAGTAA | 75           | ACAGATTC |
| 4            | GTAAGTGC | 28           | ATCCTGTA | 52           | GCTAACGA | 76           | AGATGTAC |
| 5            | AACGTGAT | 29           | ATTGAGGA | 53           | GCTCGGTA | 77           | AGCACCTC |
| 6            | CGCTGATC | 30           | CAACCACA | 54           | GGAGAACA | 78           | AGCCATGC |
| 7            | CAGATCTG | 31           | CAAGACTA | 55           | GGTGCGAA | 79           | AGGCTAAC |
| 8            | ATGCCTAA | 32           | CAATGGAA | 56           | GTACGCAA | 80           | ATAGCGAC |
| 9            | CTGTAGCC | 33           | CACTTCGA | 57           | GTCGTAGA | 81           | ATCATTCC |
| 10           | AGTACAAG | 34           | CAGCGTTA | 58           | GTCTGTCA | 82           | ATTGGCTC |
| 11           | CATCAAGT | 35           | CATACCAA | 59           | GTGTTCTA | 83           | CAAGGAGC |
| 12           | AGTGGTCA | 36           | CCAGTTCA | 60           | TAGGATGA | 84           | CACCTTAC |
| 13           | AACAACCA | 37           | CCGAAGTA | 61           | TATCAGCA | 85           | CCATCCTC |
| 14           | AACCGAGA | 38           | CCGTGAGA | 62           | TCCGTCTA | 86           | CCGACAAC |
| 15           | AACGCTTA | 39           | CCTCCTGA | 63           | TCTTCACA | 87           | CCTAATCC |
| 16           | AAGACGGA | 40           | CGAACTTA | 64           | TGAAGAGA | 88           | CCTCTATC |
| 17           | AAGGTACA | 41           | CGACTGGA | 65           | TGGAACAA | 89           | CGACACAC |
| 18           | ACACAGAA | 42           | CGCATACA | 66           | TGGCTTCA | 90           | CGGATTGC |
| 19           | ACAGCAGA | 43           | CTCAATGA | 67           | TGGTGGTA | 91           | CTAAGGTC |
| 20           | ACCTCCAA | 44           | CTGAGCCA | 68           | TTCACGCA | 92           | GAACAGGC |
| 21           | ACGCTCGA | 45           | CTGGCATA | 69           | AACTCACC | 93           | GACAGTGC |
| 22           | ACGTATCA | 46           | GAATCTGA | 70           | AAGAGATC | 94           | GAGTTAGC |
| 23           | ACTATGCA | 47           | GACTAGTA | 71           | AAGGACAC | 95           | GATGAATC |
| 24           | AGAGTCAA | 48           | GAGCTGAA | 72           | AATCCGTC | 96           | GCCAAGAC |

Sequences 1-4 were designed in house. Sequences 5 – 96 were taken from Mamanova et al. 2010.

**Table S2 Primers used for PCR amplification and Sanger sequencing reactions**

|                              | <b>Sequence (5' to 3')</b> | <b>CAPS enzyme</b> | <b>Allele cut</b> |
|------------------------------|----------------------------|--------------------|-------------------|
| <i>MAF Genotyping</i>        |                            |                    |                   |
| forward                      | ACTTCGTTCTTCACTACCGGT      | Styl               | Ws-2              |
| reverse                      | GTTCTCCTCTCTCAGCAGCT       | Styl               | Ws-2              |
| <i>Ws-2 Inversion</i>        |                            |                    |                   |
| Primer 1                     | TGGCCTGCGTCTAAACAATG       |                    |                   |
| Primer 2                     | CCATCAATCTCAATTCACAAGGG    |                    |                   |
| Primer 3                     | ATGACCAGACCACTTTCCGG       |                    |                   |
| Primer 4                     | GACGTCGAGGCTGATAATTGA      |                    |                   |
| Primer 5                     | CGGGAAAGGACTGCTGAACT       |                    |                   |
| Primer 6                     | AACAGCAAAGCCACCATCAC       |                    |                   |
| C2 forward                   | TGGTCCGGTGGTGATTTACA       |                    |                   |
| C2 reverse                   | CGGCTTCTCGAGTTACTCT        |                    |                   |
| <i>Breakpoint resolution</i> |                            |                    |                   |
| ID1 forward                  | GATGTTACCGTGGGTCGATT       |                    |                   |
| ID1 reverse                  | GTCTTCAACTTCCGGCGATA       |                    |                   |
| ID2 forward                  | CTTTGGCCGATAGACAGGAG       |                    |                   |
| ID2 reverse                  | TCAGCCACCACCACTACAAA       |                    |                   |
| ID3 forward                  | GCAGAAGATTCCGAGAGTGG       |                    |                   |
| ID3 reverse                  | TGGTCTTGGTCCGAAAATGT       |                    |                   |
| ID4 forward                  | TTCCCAATTTGATCCAGAG        |                    |                   |
| ID4 reverse                  | CAGGCGGAGGAGTGTAAGAG       |                    |                   |
| ID5 forward                  | CCCGCCAAAATAAACAAAGA       |                    |                   |
| ID5 reverse                  | CACGAAGTTTCTCGGCTTTC       |                    |                   |
| ID6 forward                  | TGAACAGACAATTTGCTCCAA      |                    |                   |
| ID6 reverse                  | AGGCCAACGTTTAGGAGGAT       |                    |                   |
| ID7 forward                  | TTCCCTGCATCCTAGTCCTG       |                    |                   |
| ID7 reverse                  | AAAAGGAATGGCACACGTTT       |                    |                   |
| ID8 forward                  | CCGTCAATTTGAGCAGGAAT       |                    |                   |
| ID8 reverse                  | TTCTACGCACACCAGGGATT       |                    |                   |
| ID9 forward                  | GCGTAATCATCACTCGCTCA       |                    |                   |
| ID9 reverse                  | TGCAAACACGGAAGACAGTT       |                    |                   |
| ID10 forward                 | GCCATGCGTACCTGAAAAGT       |                    |                   |
| ID10 reverse                 | ATTGGCATCACGAGGAAAAGT      |                    |                   |
| ID11 forward                 | CAATTAACAAGGCCGAGTAAAGA    |                    |                   |
| ID11 reverse                 | GGAATCTCCCTTGGTCCCTA       |                    |                   |

**Table S3 Price comparison for individual components and reagents needed for paired-end library preparation**

Our Method

|                                         | Manufacturer         | Part number | Price per package | Samples per package | Price per sample |
|-----------------------------------------|----------------------|-------------|-------------------|---------------------|------------------|
| <b>DNA fragmentation</b>                |                      |             |                   |                     |                  |
| dsDNA Shearase™                         | Zymo Research        | E2018-200   | 396               | 400                 | 0.99             |
| <b>A-tailing</b>                        |                      |             |                   |                     |                  |
| Klenow exo-dATP                         | New England Biolabs  | M0212L      | 236               | 400                 | 0.59             |
|                                         | New England Biolabs  | N0440S      | 48                | 5000                | 0.01             |
| <b>Adapter Ligation</b>                 |                      |             |                   |                     |                  |
| Custom adapter oligos                   | Sigma-Aldrich        | NA          | 3840              | 576000              | 0.01             |
| P2 adapter oligos                       | Sigma-Aldrich        | NA          | 40                | 6000                | 0.01             |
| Quick Ligation Kit™                     | New England Biolabs  | M2200L      | 388               | 300                 | 1.29             |
| NEB Buffer 2                            | New England Biolabs  | B7002S      | 18                | 384                 | 0.05             |
| <b>PCR Enrichment</b>                   |                      |             |                   |                     |                  |
| Phusion Mastermix                       | New England Biolabs  | M0531S      | 170               | 9600                | 0.02             |
| Primer oligos                           | Sigma-Aldrich        | NA          | 47                | 28800000            | 0.000002         |
| <b>TOTAL for Reagents</b>               |                      |             |                   |                     | <b>2.96</b>      |
| <b>Clean-ups</b>                        |                      |             |                   |                     |                  |
| AmpPure XP Magnetic Beads               | Beckman-Coulter      | A63881      | 1126              | 508                 | 2.22             |
| <b>TOTAL for Library prep</b>           |                      |             |                   |                     | <b>5.18</b>      |
| <b>Validation</b>                       |                      |             |                   |                     |                  |
| Qubit DNA quantification reagents       | Life Technologies    | Q32851      | 79                | 9600                | 0.01             |
| Bioanalyzer reagents                    | Agilent Technologies | 5067-1505   | 349               | 28800               | 0.01             |
| <b>TOTAL for Preparation/Validation</b> |                      |             |                   |                     | <b>5.20</b>      |
| <b>Pre-Library Prep Quantification</b>  |                      |             |                   |                     |                  |
| Qubit DNA quantification reagents       | Life Technologies    | Q32851      | 79                | 100                 | 0.79             |
| <b>TOTAL for all</b>                    |                      |             |                   |                     | <b>5.99</b>      |

## Illumina Tru-Seq Nano

|                                         | Manufacturer         | Part number | Price per package | Samples per package | Price per sample |
|-----------------------------------------|----------------------|-------------|-------------------|---------------------|------------------|
| <b>DNA Fragmentation</b>                |                      |             |                   |                     |                  |
|                                         | Covaris              | 520045      | 125               | 25                  | 5                |
| <b>Library Prep</b>                     |                      |             |                   |                     |                  |
| TruSeq Nano                             | Illumina             | FC-121-4003 | 2880              | 96                  | 30               |
| <b>TOTAL for Library prep</b>           |                      |             |                   |                     | <b>35</b>        |
| <b>Validation</b>                       |                      |             |                   |                     |                  |
| Qubit DNA quantification reagents       | Life Technologies    | Q32851      | 79                | 9600                | 0.01             |
| Bioanalyzer reagents                    | Agilent Technologies | 5067-1505   | 349               | 28800               | 0.01             |
| <b>TOTAL for Preparation/Validation</b> |                      |             |                   |                     | <b>35.02</b>     |
| <b>Pre-Library prep Quantification</b>  |                      |             |                   |                     |                  |
| Qubit DNA quantification reagents       | Life Technologies    | Q32851      | 79                | 100                 | 0.79             |
| <b>TOTAL for all</b>                    |                      |             |                   |                     | <b>35.81</b>     |

Prices are based on the list price for the US market (in US dollars). The reagents needed for library quantification for normalization purposes, plastic consumables such as 96-well PCR plates, and general laboratory reagents are not included, as they are not included in the Illumina TruSeq kit.

**Table S4. Genotype frequencies in wt and *recq4a* F<sub>2</sub> populations**

|               | <b>Col-0</b> | <b>Ws-2</b> | <b>Het</b> |
|---------------|--------------|-------------|------------|
| wt            | 28.0%        | 21.8%       | 50.2%      |
| <i>recq4a</i> | 23.8%        | 25.6%       | 50.7%      |

**Table S5 Summary of flowering time statistics for parental and F<sub>2</sub> populations**

| <b>Background</b> | <b>Genotype</b> | <b>N</b> | <b>Mean Days to Flowering ( ± sem)</b> | <b>Mean Rosette Leaf Number ( ± sem)</b> |
|-------------------|-----------------|----------|----------------------------------------|------------------------------------------|
| Col-0             | wt              | 64       | 27.19 ( ± 0.18)                        | 13.34 ( ± 0.19)                          |
| Col-0             | <i>recq4a</i>   | 65       | 24.92 ( ± 0.32)                        | 11.4 ( ± 0.14)                           |
| F <sub>2</sub>    | wt              | 1133     | 23.07 ( ± 0.07)                        | 9.66 ( ± 0.05)                           |
| F <sub>2</sub>    | <i>recq4a</i>   | 1052     | 21.95 ( ± 0.07)                        | 9.23 ( ± 0.06)                           |
| Ws-2              | wt              | 66       | 19.65( ± 0.16)                         | 6.72 ( ± 0.14)                           |
| Ws-2              | <i>recq4a</i>   | 136      | 18.96 ( ± 0.11)                        | 6.1 ( ± 0.07)                            |

Phenotypes were scored when the inflorescence shoot reached the height of 1 cm. Abbreviations used: SD, standard deviation; sem, standard error of the mean.

**Table S6 Additional statistics for QTL analyses of flowering time**

|                      | <b>Position (Mb)</b> | <b>LOD</b> | <b>Variance explained (%)</b> |
|----------------------|----------------------|------------|-------------------------------|
| <b>wt</b>            |                      |            |                               |
| Rosette Leaf Number  | 25.55                | 5.09       | 20.7                          |
| Days to Flower       | 25.99                | 3.92       | 16.4                          |
| <b><i>recq4a</i></b> |                      |            |                               |
| Rosette Leaf Number  | 26.02                | 8.73       | 24.6                          |
| Days to Flower       | 25.86                | 9.55       | 23.7                          |
| <b>Combined</b>      |                      |            |                               |
| Rosette Leaf Number  | 26.02                | 8.52       | 16.7                          |
| Days to Flower       | 25.99                | 10.25      | 19.5                          |

**Table S7 Flowering time as a function of *MAF4* and *RECQ4A* genotypes**

|                                      | <b>DF</b> | <b>Sum of Squares</b> | <b>Mean Squares</b> | <b>F value</b> | <b>P-value</b> |
|--------------------------------------|-----------|-----------------------|---------------------|----------------|----------------|
| <b>Days to Flowering</b>             |           |                       |                     |                |                |
| <i>MAF4</i> Genotype                 | 2         | 78.7                  | 39.4                | 8.6            | 2.8e-4         |
| <i>RECQ4A</i> genotype               | 1         | 16.3                  | 16.3                | 3.6            | 0.06           |
| <i>RECQ4A</i> x <i>MAF4</i> Genotype | 2         | 0.8                   | 0.4                 | 0.09           | 0.92           |
| <b>Rosette Leaf Number</b>           |           |                       |                     |                |                |
| <i>RECQ4A</i> genotype               | 2         | 91.7                  | 45.8                | 26.5           | 9e-11          |
| <i>MAF4</i> Genotype                 | 1         | 19.5                  | 19.5                | 11.3           | 1e-3           |
| <i>RECQ4A</i> x <i>MAF4</i> Genotype | 2         | 6.8                   | 3.4                 | 1.95           | 0.15           |

Flowering time phenotypes were scored among F<sub>2</sub> individuals from the wt and *recq4a* populations that had been genotyped at the *MAF4* locus. Shown are the results of an analysis of variance (ANOVA). See Table S5 for summary statistics of the phenotypic data.

**Literature cited**

Mamanova, L., Coffey, A. J., Scott, C. E., Kozarewa, I., Turner, E. H., Kumar, A., Howard, E., Shendure, J. Turner, D. 2010. Target-enrichment strategies for next-generation sequencing. *Nature Methods* 7(2):111-118

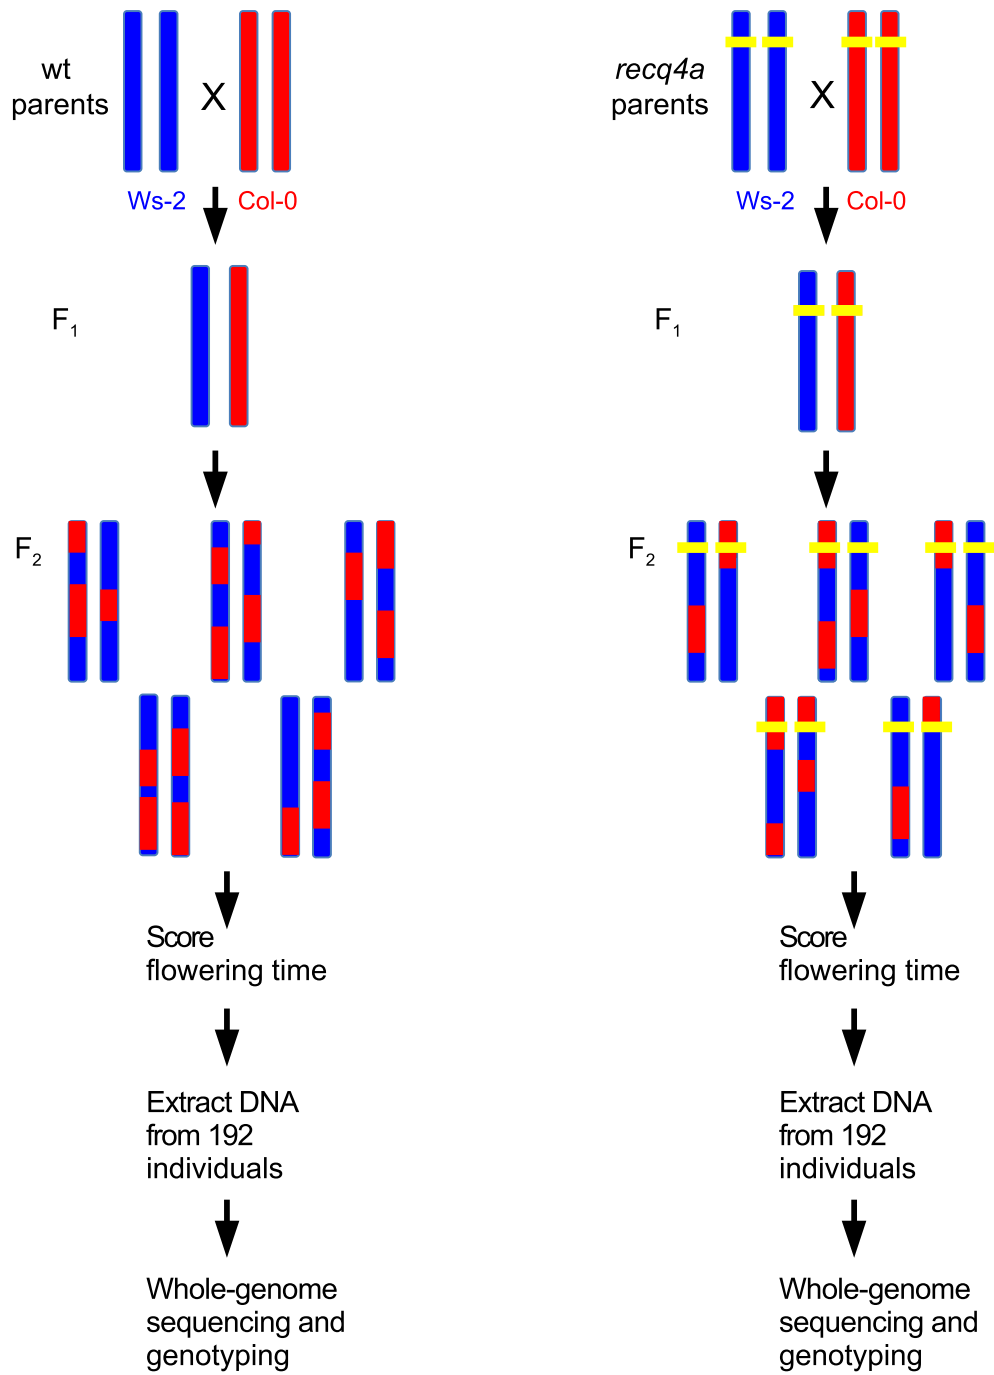

**Figure S1.** Crossing scheme and workflow for mapping flowering time QTL.

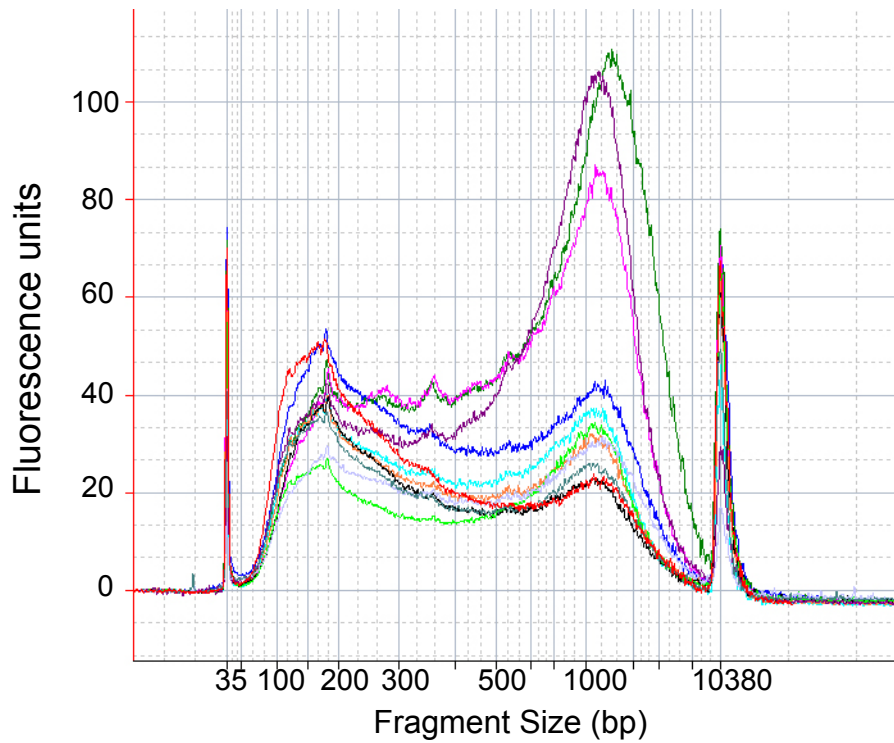

**Figure S2** Fragment size distribution of Shearase™-digested *Arabidopsis thaliana* DNA. Bioanalyzer traces of 11 DNA samples from one 96-plex library prep after digestion with the Shearase™ enzyme are shown.

**A**

P1

INDEX1

5' ACACTCTTTCCCTACACGACGCTCTCCGATCT *ACGTAGCT*\*T (sense)

5'P-*AGCTACGT*AGATCGGAAGAGCGTTCGTGTAGGGAAAGAGTG\*T (antisense)

P2

5' P-GATCGGAAGAGCGTTTCAGCAGGAATGCCGA\*G (sense)

5' CTCGGCATTCTGCTGAACCGCTCTCCGATC\*T (antisense)

**B**

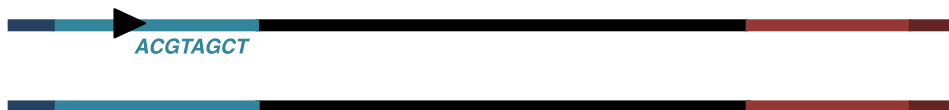

**Figure S3** Design of custom adapters used for multiplexing. A) Oligo sequences for the indexing adapters. The index is added to the 3' end of the Illumina P1 adapter. An example index sequence (in italics) is shown. See Table S1 for all 96 index sequences. "P" is used to indicate a 5' phosphate addition. The \* shows the position of a phosphorothioate bond. Oligo sequences for the universal Illumina P2 adapter are also shown. B) Schematic diagram showing adapters ligated to DNA fragments. The arrow indicates the direction of sequencing using the Illumina primer for the first read. The first 8 bases of sequence for read 1 are the index sequence.



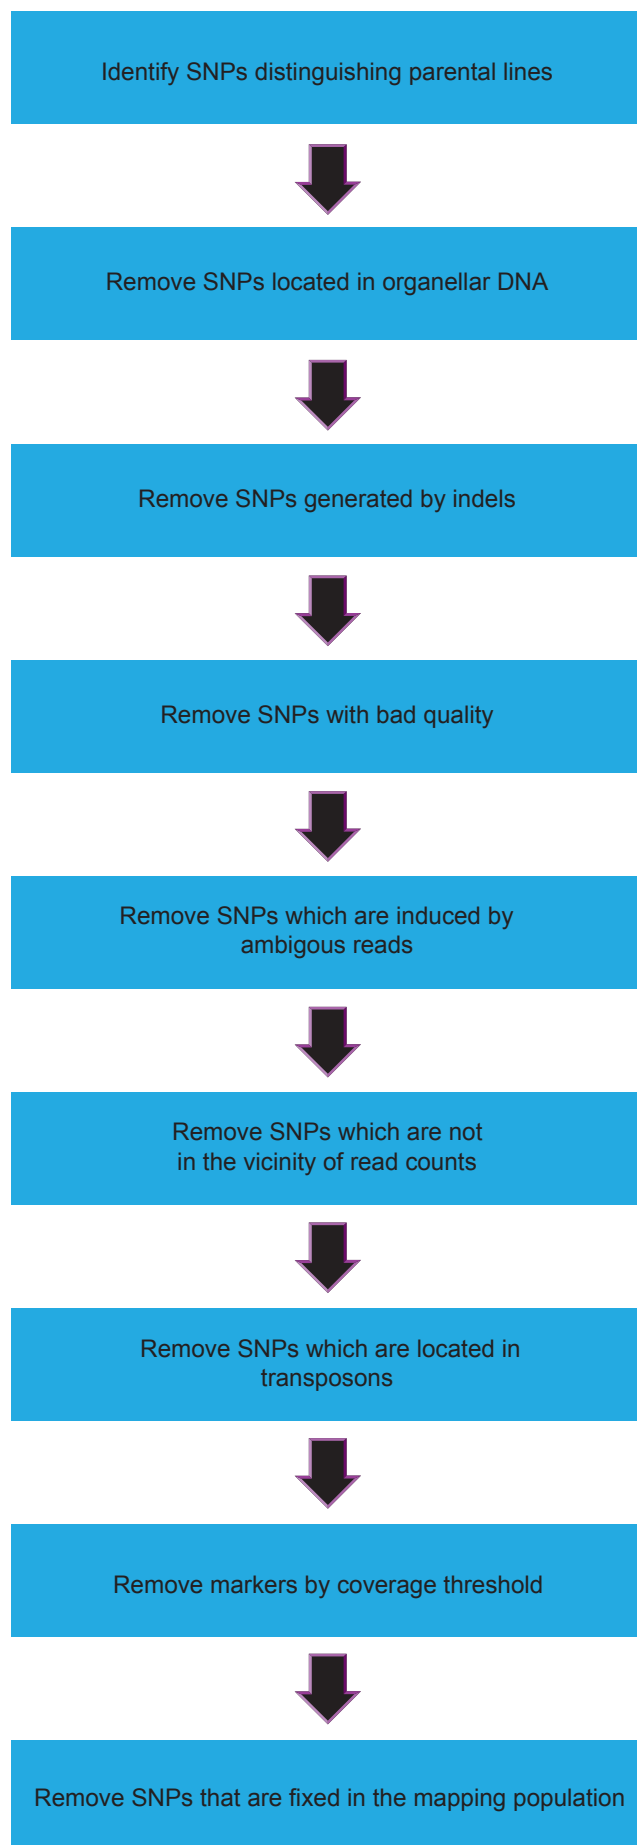

**Figure S4** Ws-2 marker filtering workflow. Stepwise representation of the marker filtering pipeline used to select SNPs for downstream implementation in TIGER.

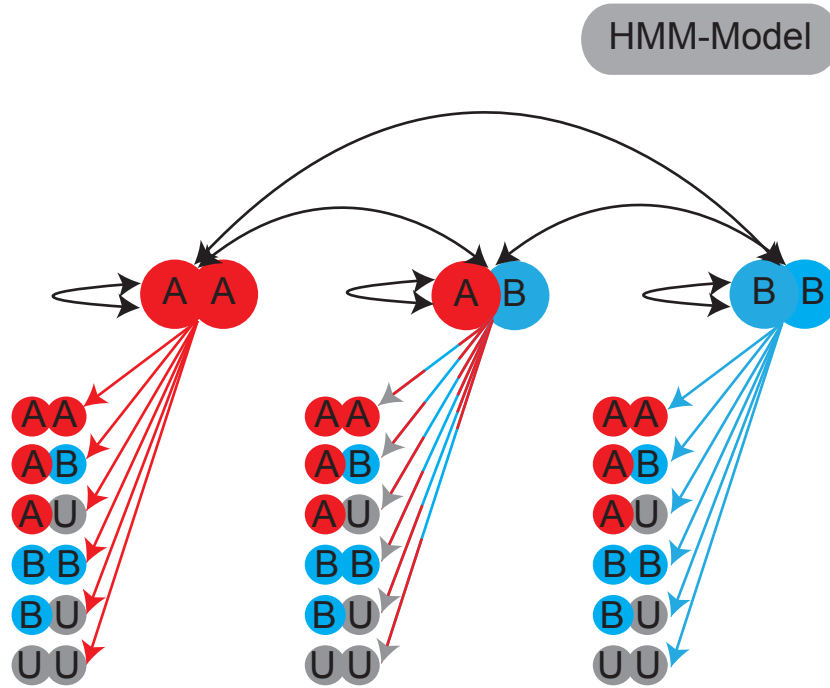

**Figure S5** Schematic representation of the HMM used in TIGER. Red indicates parent one, blue indicates parent two and grey indicates no information (unknown).

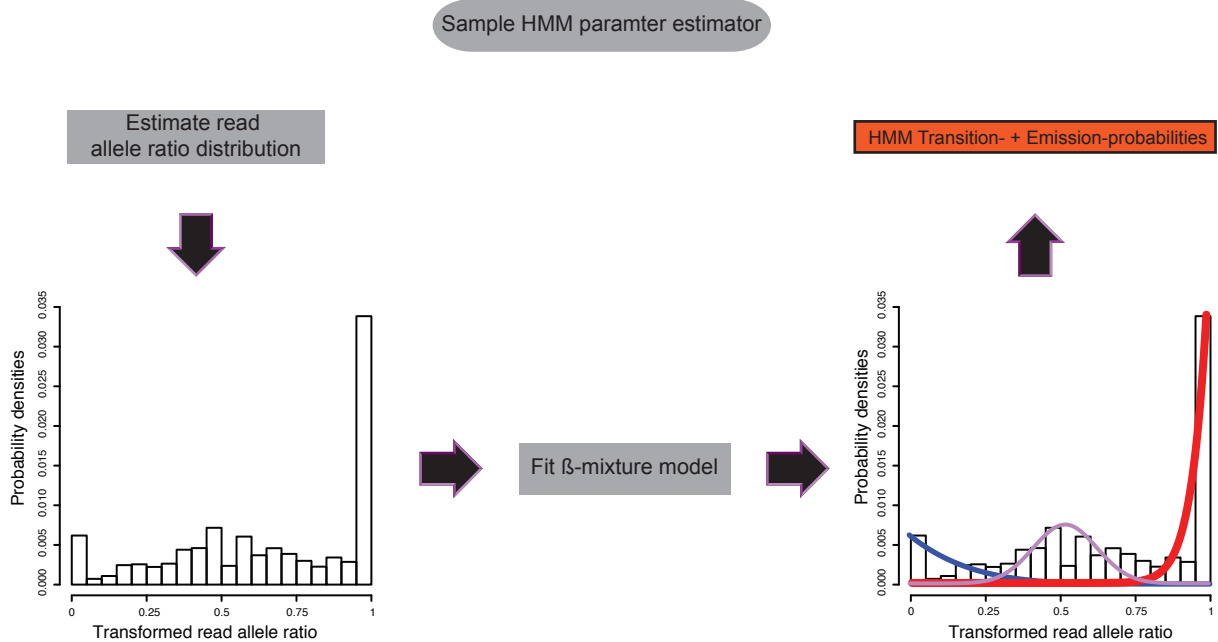

**Figure S6** Schematic workflow of the parameter estimator for the HMM. For each sample the read allele ratio is estimated from the result of a sliding window approach. The resulting frequencies are then transformed to interval of 0 and 1 as the beta function is only defined at that region. Afterwards the beta-mixture model fit is applied. The probabilities for the sample-specific HMM are estimated from the resulting three curves and the output from the Basecaller.

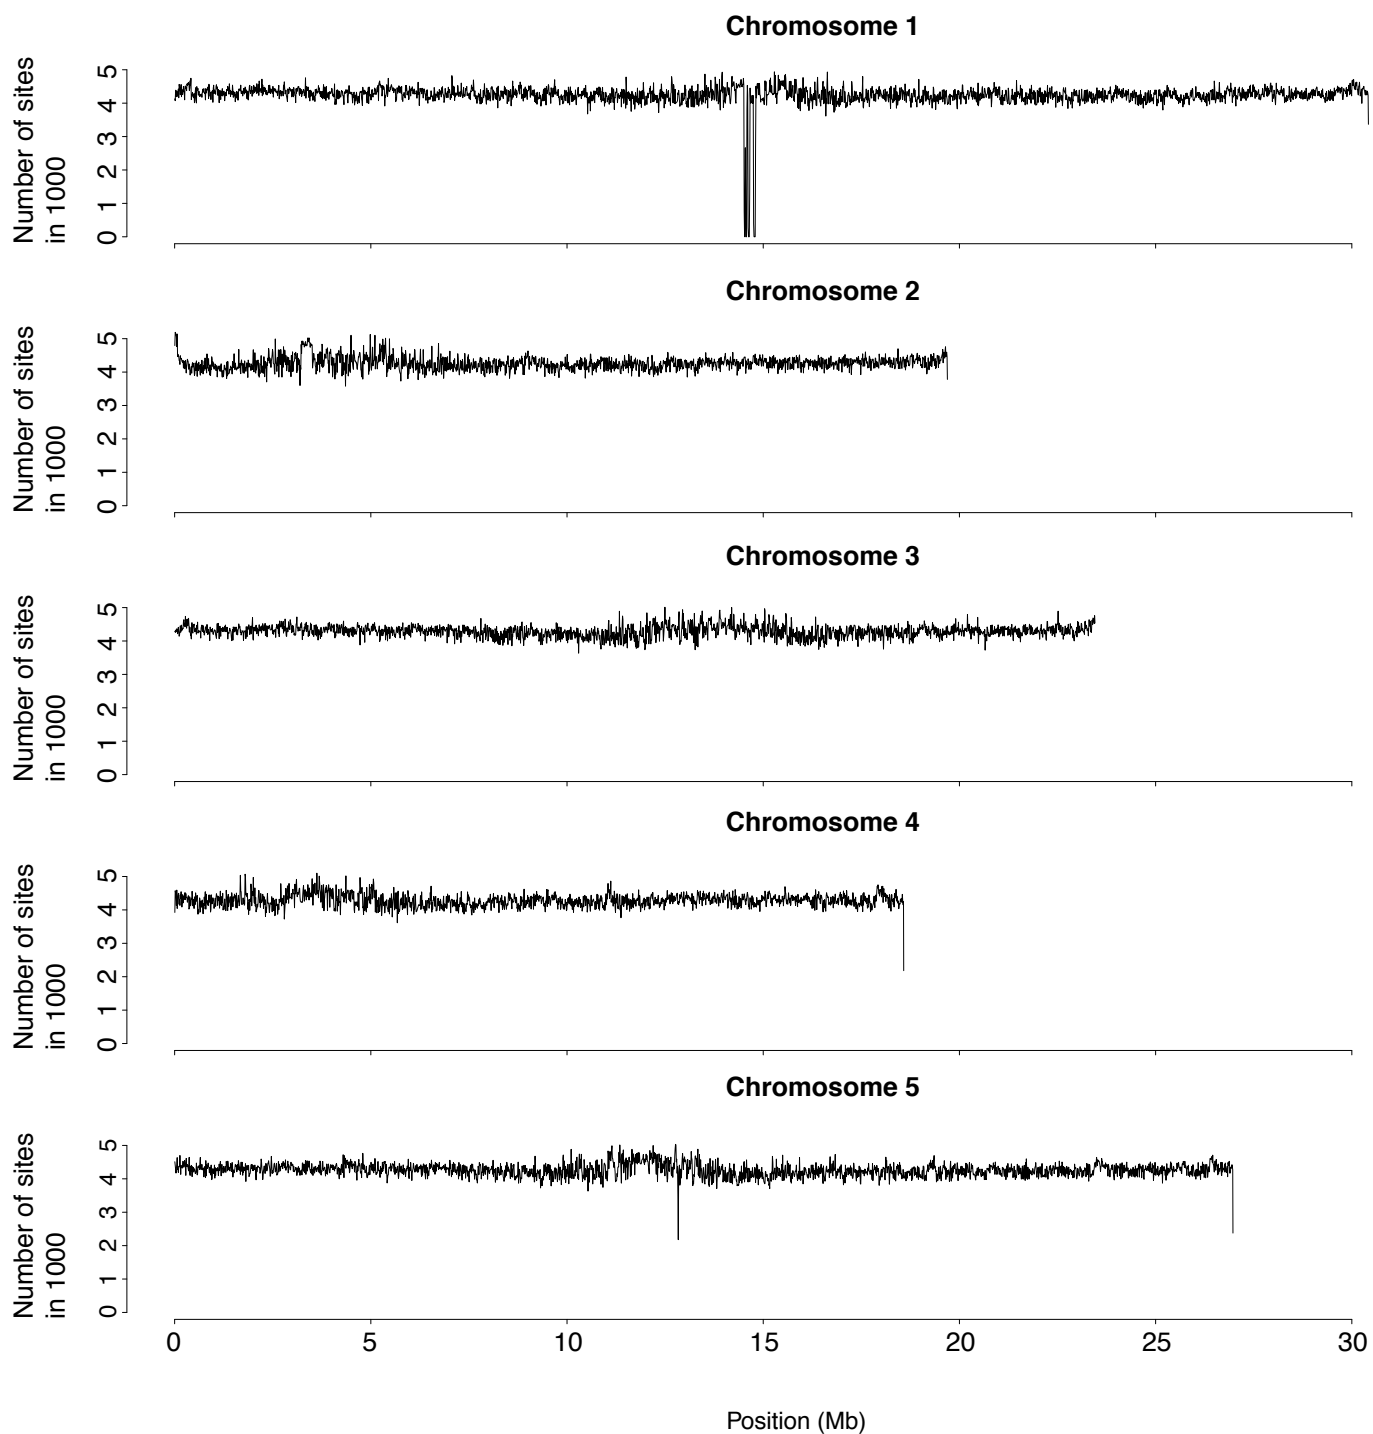

**Figure S7** Distribution of dsDNA Shearase™ cutting sites across the genome. The enzyme recognizes a site with the degenerate sequence 5' NVBN 3', where N = any base, V = any base except for T, and B = any base except for A. The frequency of recognition sites across the *A. thaliana* genome over a 10 kb sliding window is shown.

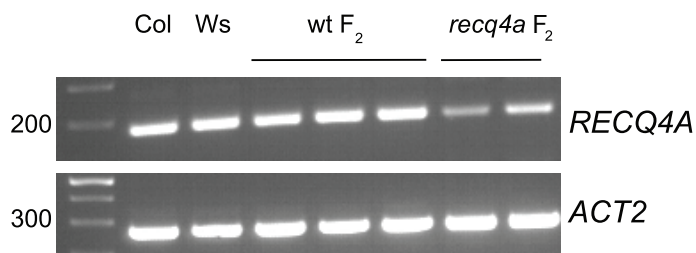

**Figure S8** Expression of *RECQ4A* transcripts in wt parents, wt  $F_2$ , and *recq4a*  $F_2$  individuals. All samples are mixed-stage flowers from a single individual. Numbers on the left indicate the size of the fragments (in base pairs). The *ACT2* gene was used as a control.

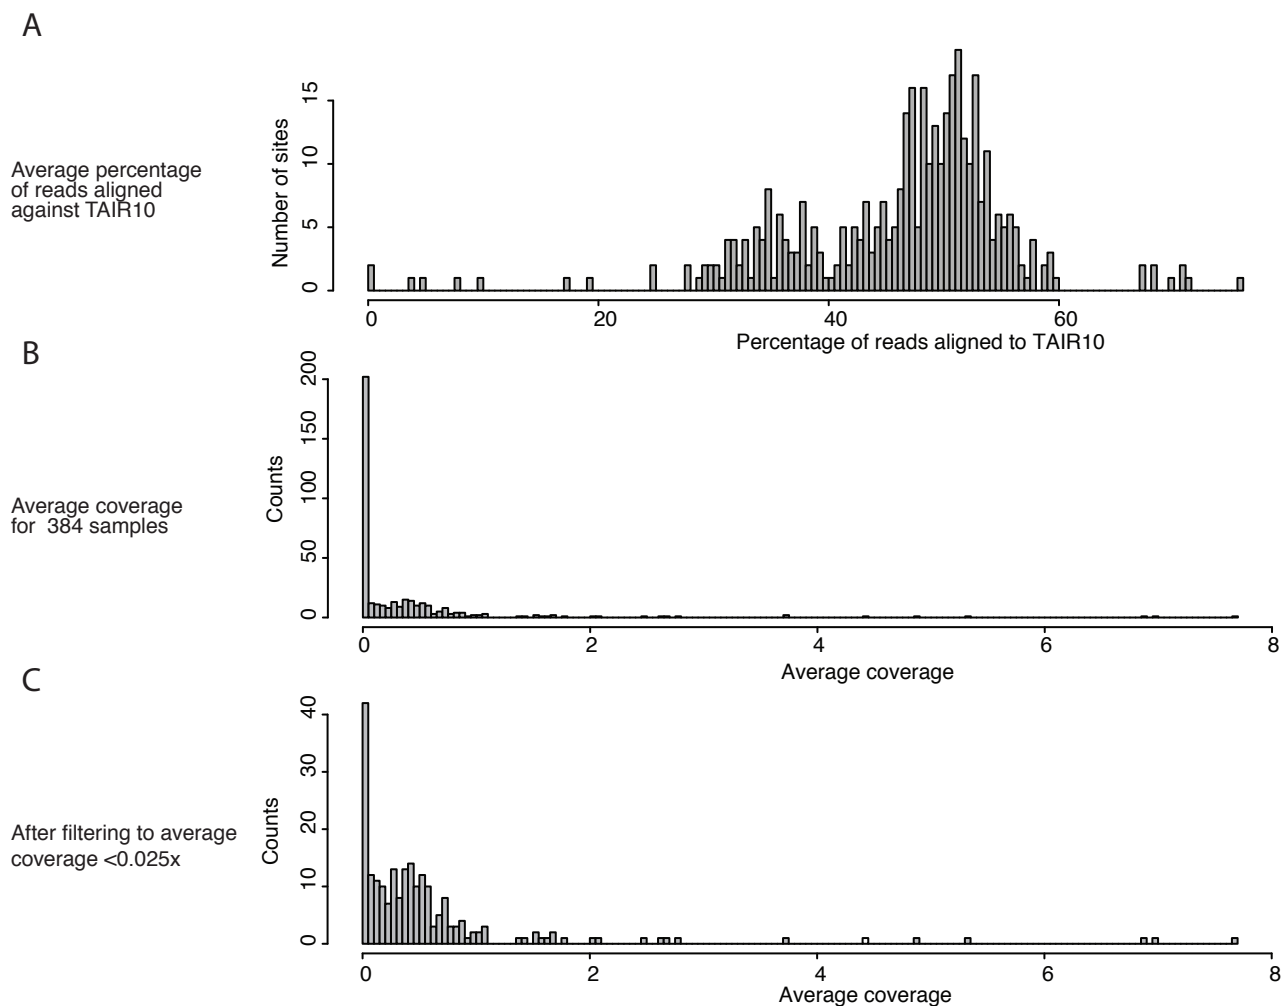

**Figure S9** Coverage per sample and percentage of reads aligned. A) Average number of reads aligned to the used reference sequence TAIR10. The distribution of average read coverage (represented as the fold coverage of the *A. thaliana* reference genome) per sample is shown for all samples in B and for only samples where the average coverage was greater than 0.025x in C.

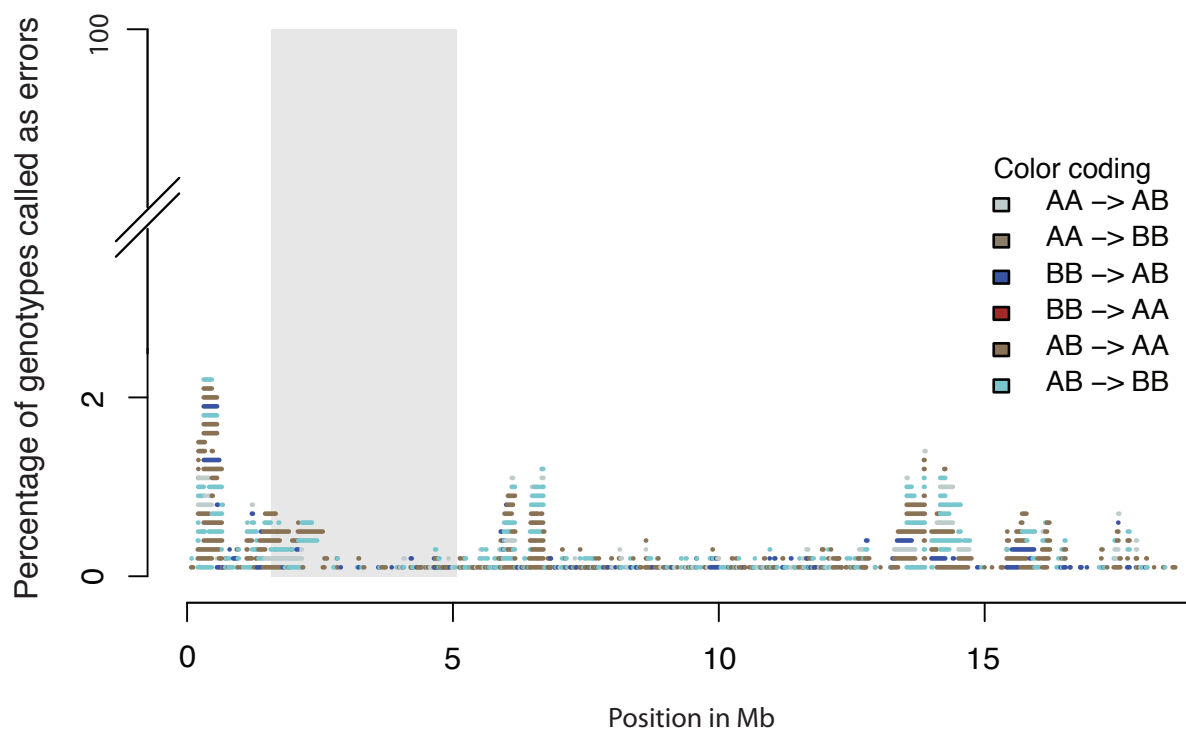

**Figure S10** The frequency of different types of genotyping errors produced by TIGER using simulated data. An example of an error profile for chromosome 4 is shown (results were similar for the other four chromosomes). The grey box indicates the location of the centromere. The error frequencies are obtained from using TIGER to predict genotypes from random read data from 1000 simulated recombinant individuals.

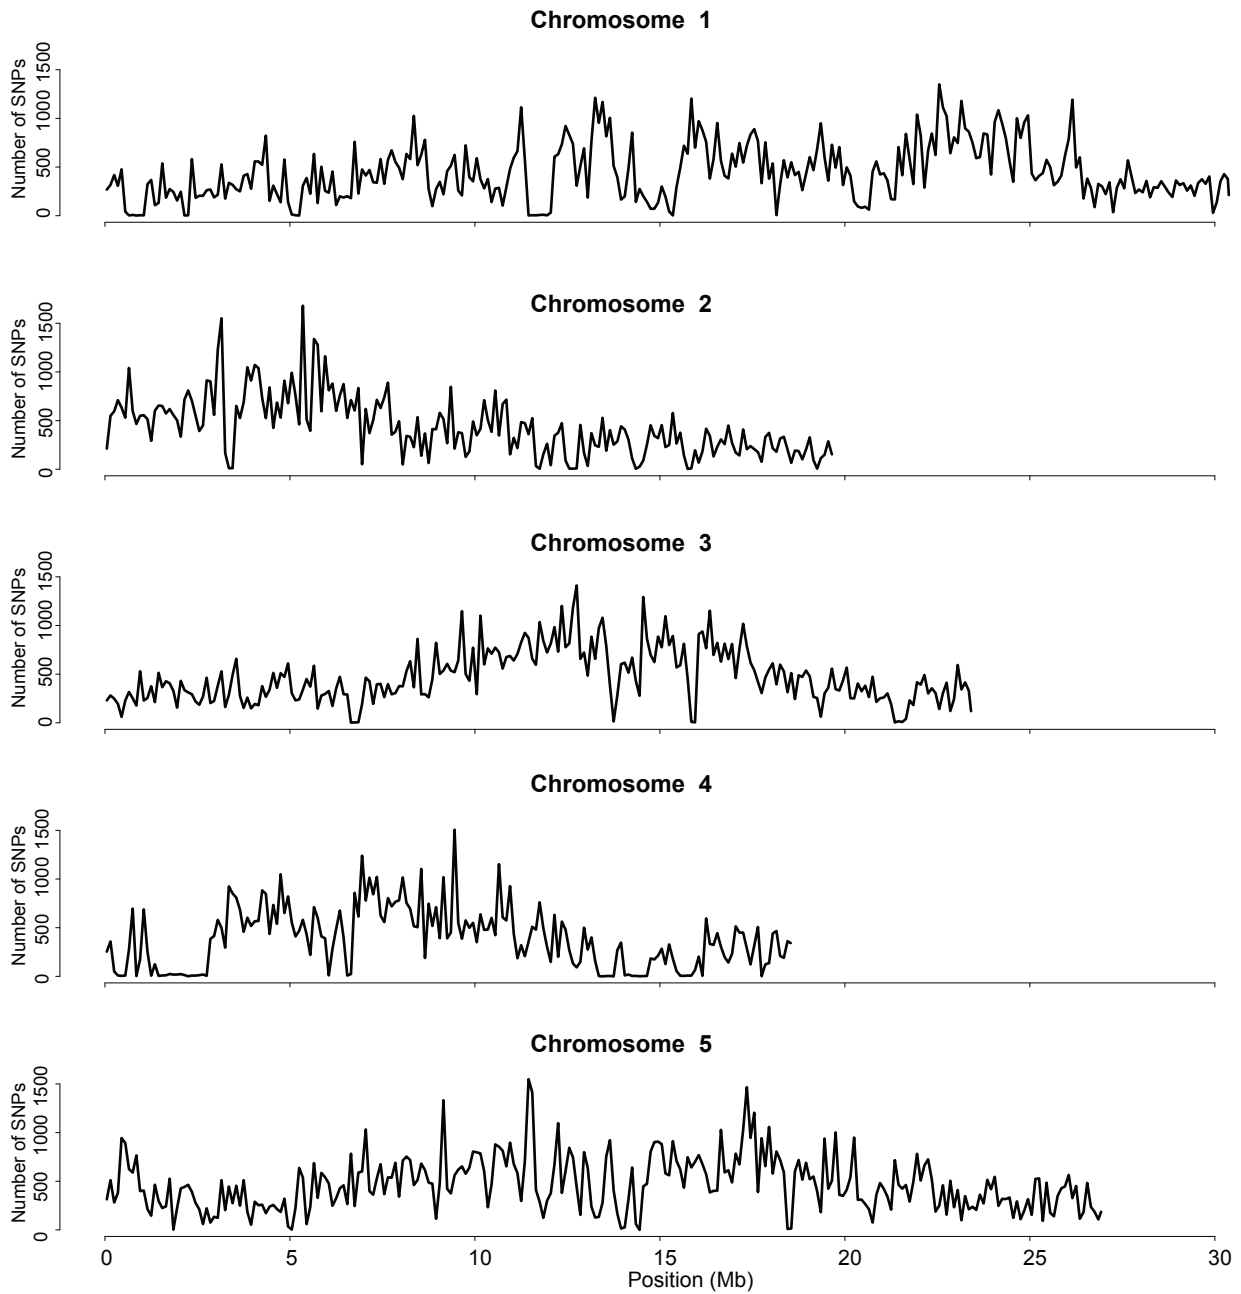

**Figure S11** SNP density between Col-0 and Ws-2. The post-filtering SNP density (see Figure S4 for filtering parameters) using a sliding window of 100 kb is shown for each of the five *A. thaliana* chromosomes.

A

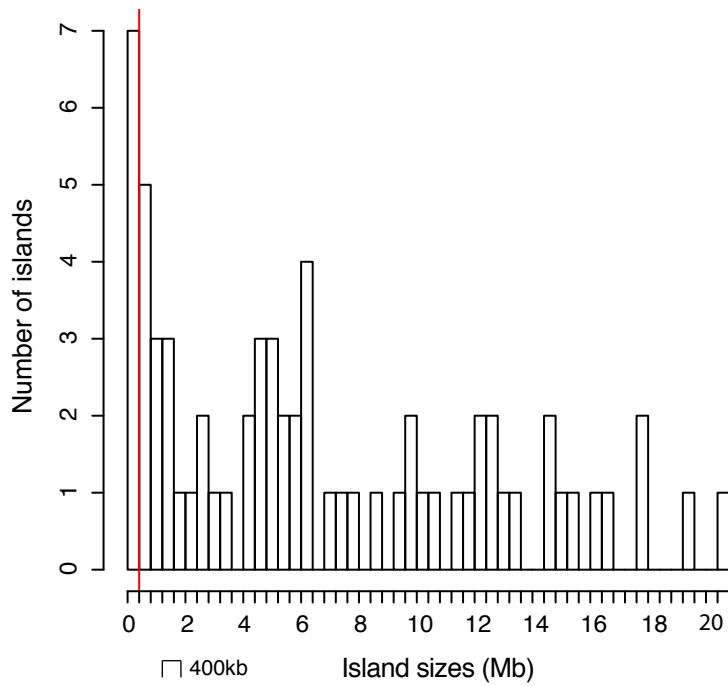

B

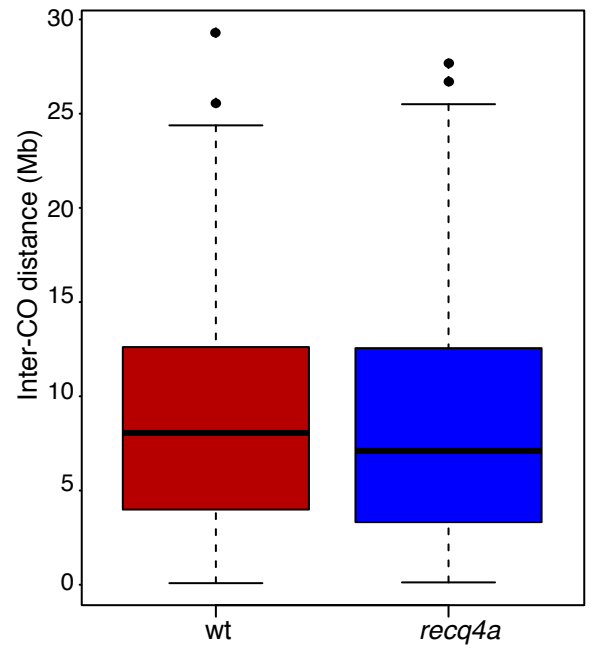

**Figure S12** “Island” errors and double COs. TIGER-generated reconstructions of experimental recombinant individuals produced a type of error where a small genotype block was embedded in a larger block of a different genotype. A) Histogram depicting the frequency of the lengths of these small genotype “islands” is shown. Some of these islands are errors, others might represent real closely-spaced double COs. The red line indicates the chosen threshold for distinguishing between island errors and true double COs. B) Box plots showing the inter-CO distances for all true double COs in the wt compared with the mutant population.

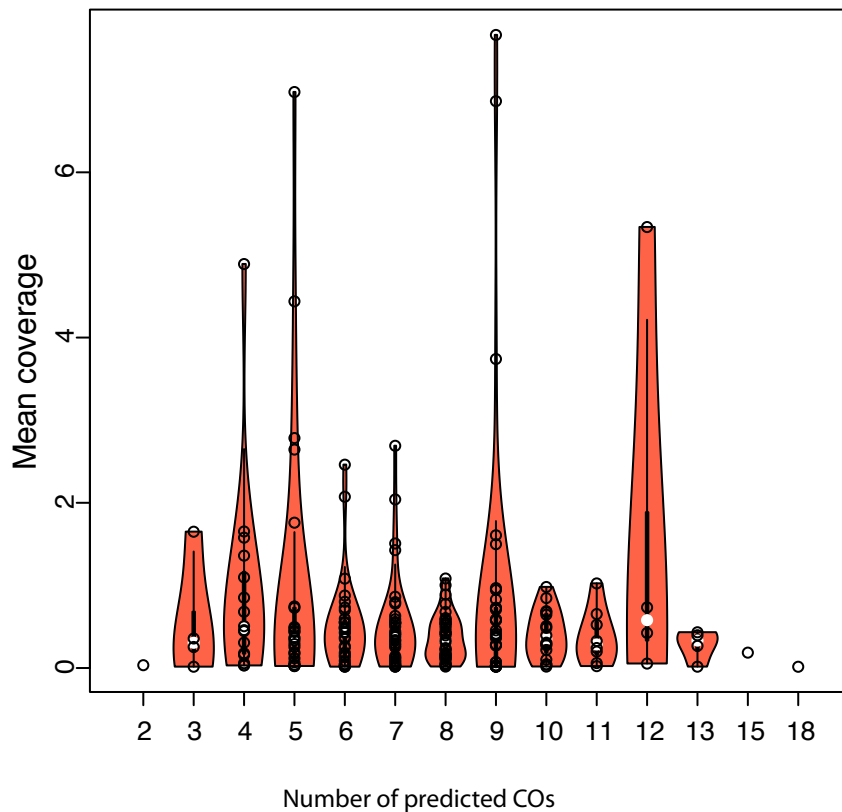

**Figure S13** The effect of coverage on CO prediction using TIGER. The density curve for probabilities (orange) is indicated for each number of predicted COs compared to the coverage rate.

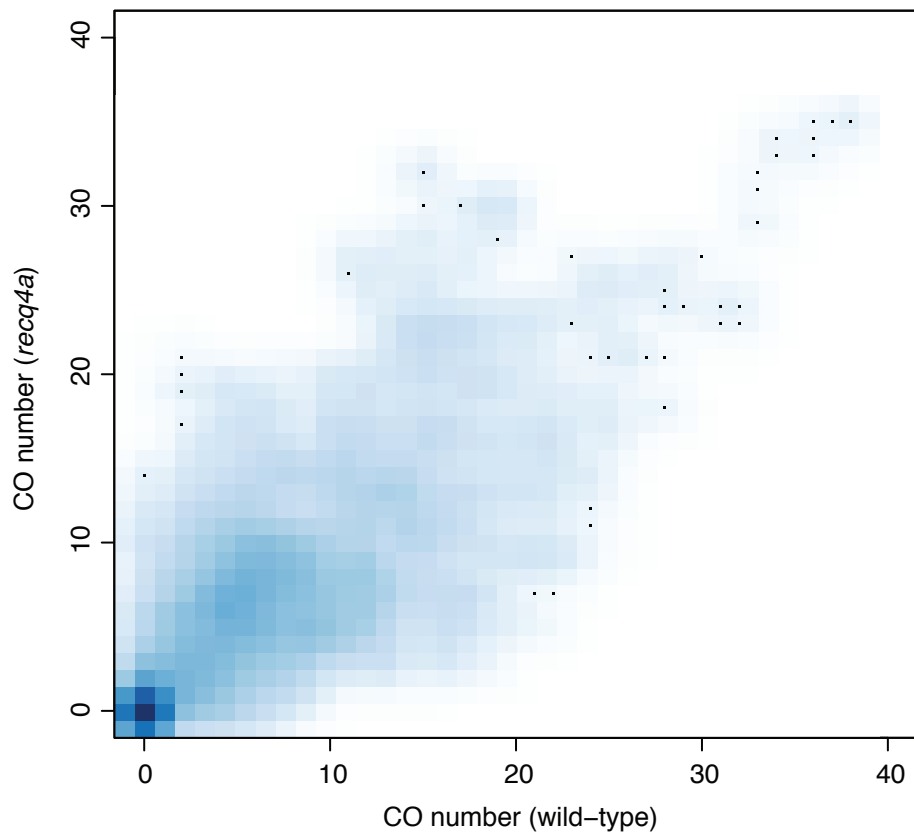

**Figure S14** Correlation between CO distributions throughout the genome between wild-type and *recq4a* F<sub>2</sub> populations. Frequencies of 800-kb windows with the given numbers of COs are shown using a color scale from light (lowest) to dark (highest) blue.



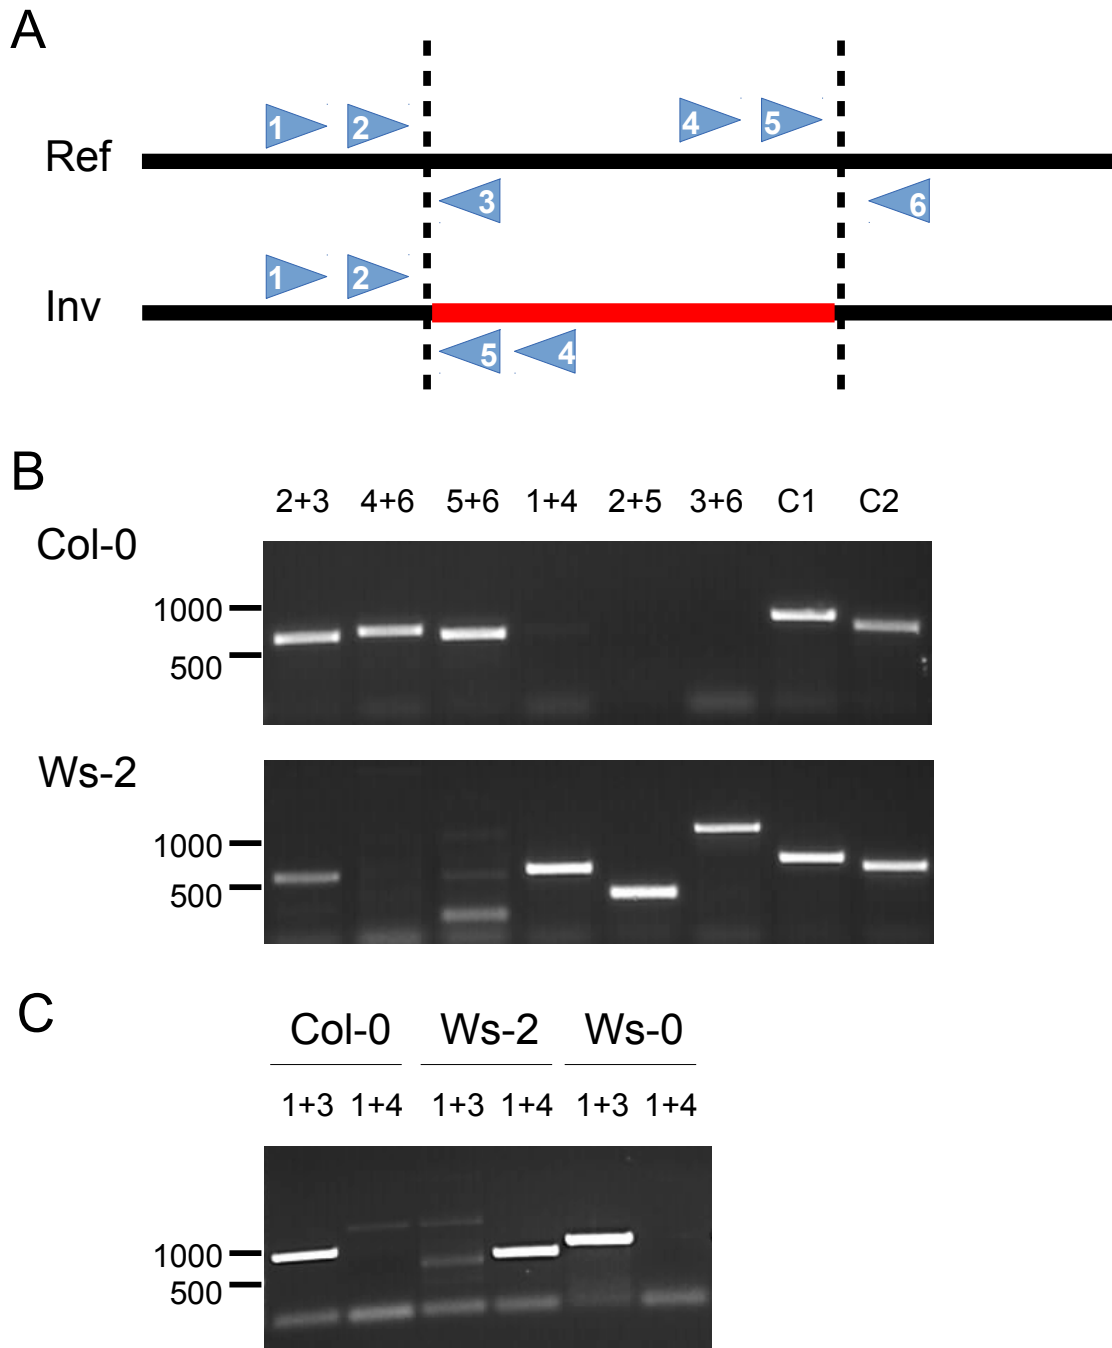

**Figure S15** PCR amplification around predicted inversion breakpoints. (A) Schematic diagram showing the relative locations and orientations of primers around the predicted breakpoint positions (dashed vertical lines) at base positions 7139542 and 8914936 on Chr 4 (not drawn to scale). (B) PCR bands amplified using the indicated combinations of the primers shown in A. “C1” is a control amplicon from Chr 5 (*MAF4*) and “C2” is a control amplicon from Chr 1. (C) PCR bands amplified using the indicated combinations of the primers shown in A for Col-0, Ws-2 and Ws-0. The faint band visible for Ws-2 in the lane for primers 2+3 in B) is likely an off-target amplicon, as this primer set amplified bands of different sizes from Ws-2 DNA in replicate experiments at different annealing temperatures (data not shown).

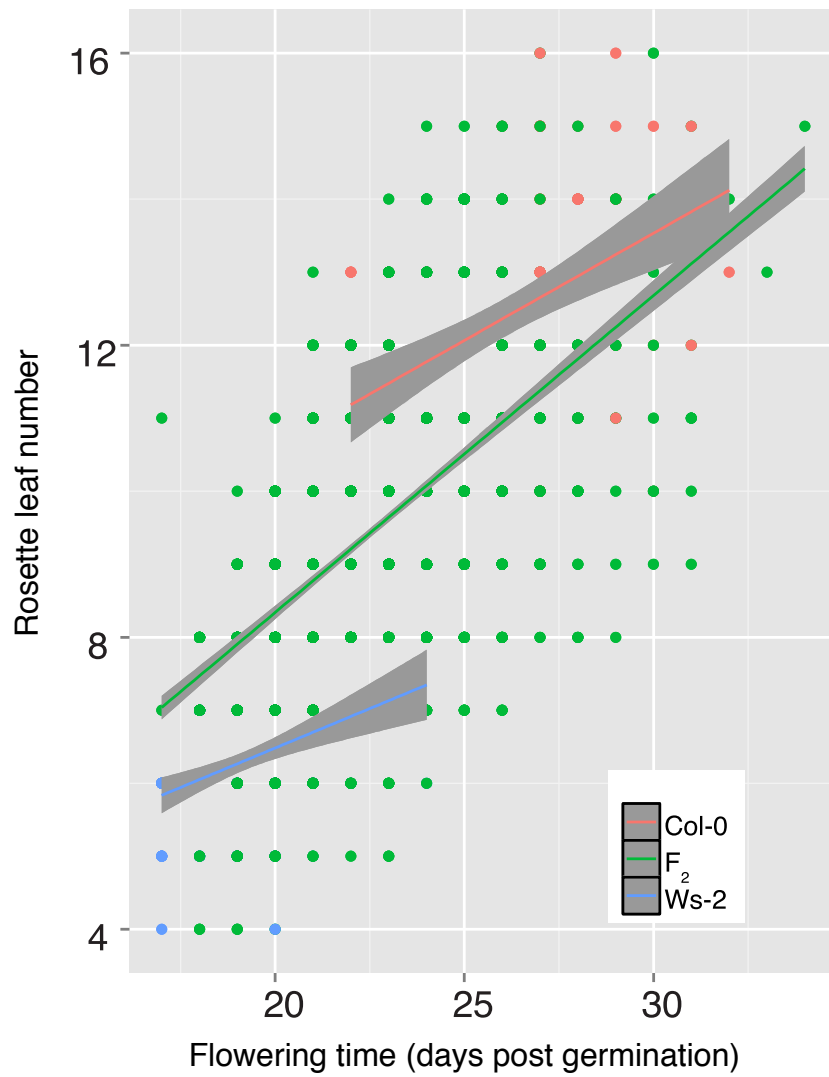

**Figure S16** Correlation between the number of days to flower and the number of rosette leaves at flowering.  $R^2 = 0.18, 0.3,$  and  $0.09$  for Col-0, F, and Ws-2, respectively.  $N=129, 2185,$  and  $202$  for Col-0, F<sub>2</sub>, and Ws-2, respectively. Equation of Col line:  $y = 0.29x + 4.7$   $R^2 = 0.18$ . Equation of F<sub>2</sub> line:  $y = 0.43x - 0.35$   $R^2 = 0.3$ . Equation of Ws-2 line:  $y = 0.22x + 2.3$   $R^2 = 0.09$ .

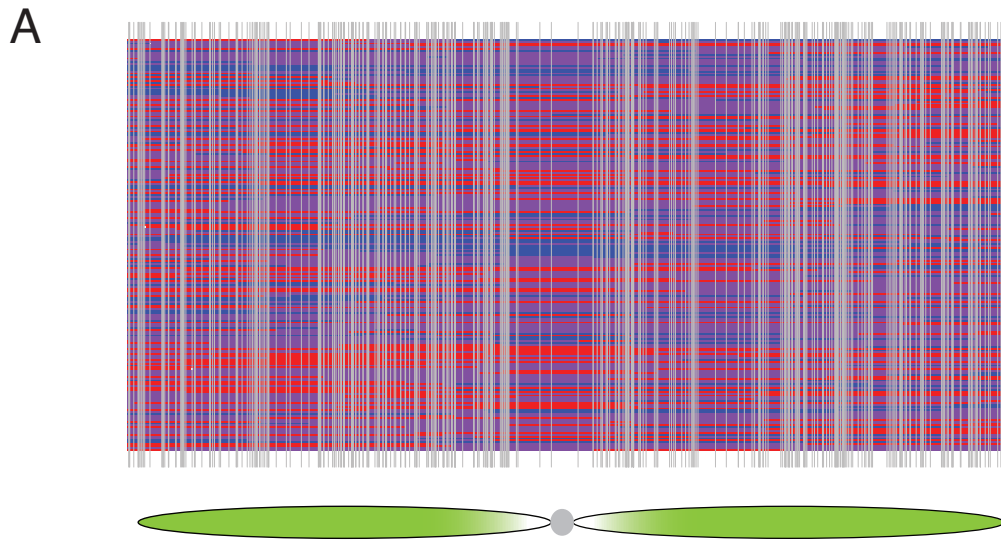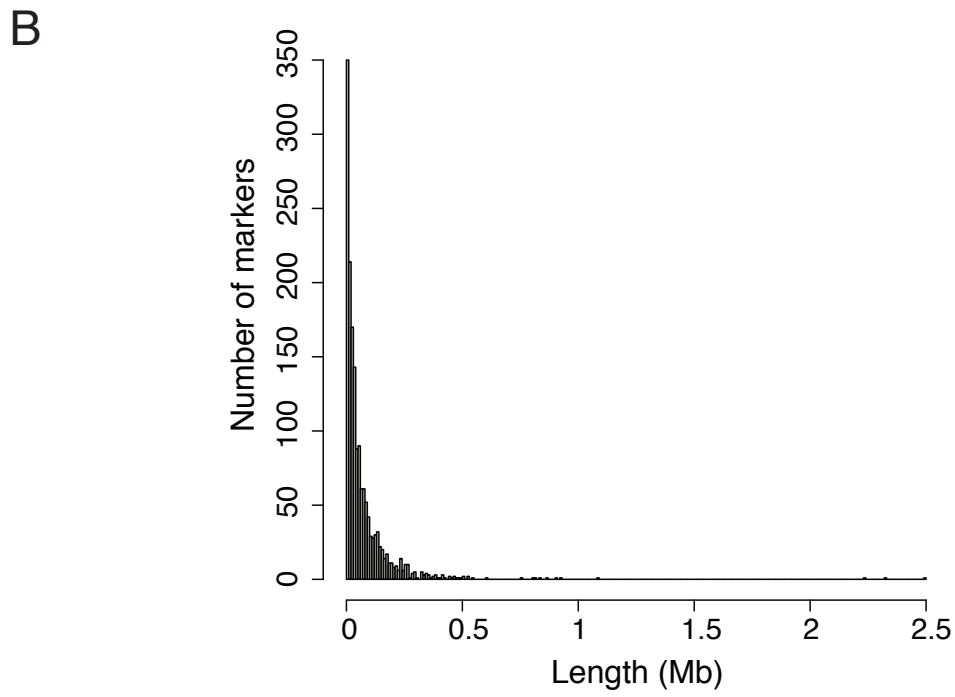

**Figure S17** Recombination blocks used as markers for QTL analysis. A) A graphical representation of the recombination block that were used as markers for QTL mapping of flowering time in wt and *recq4a*. Graphical reconstructions of the genotypes along chromosome 1 are shown. Each horizontal line represents a single individual. Red indicates homozygous for Col-0, blue depicts homozygous for Ws-2 and heterozygous regions are in purple. The thin grey lines indicate the positions where at least one individual had a CO. SNPs in the regions between lines were used as markers for QTL analysis. B) Length distributions of the recombination

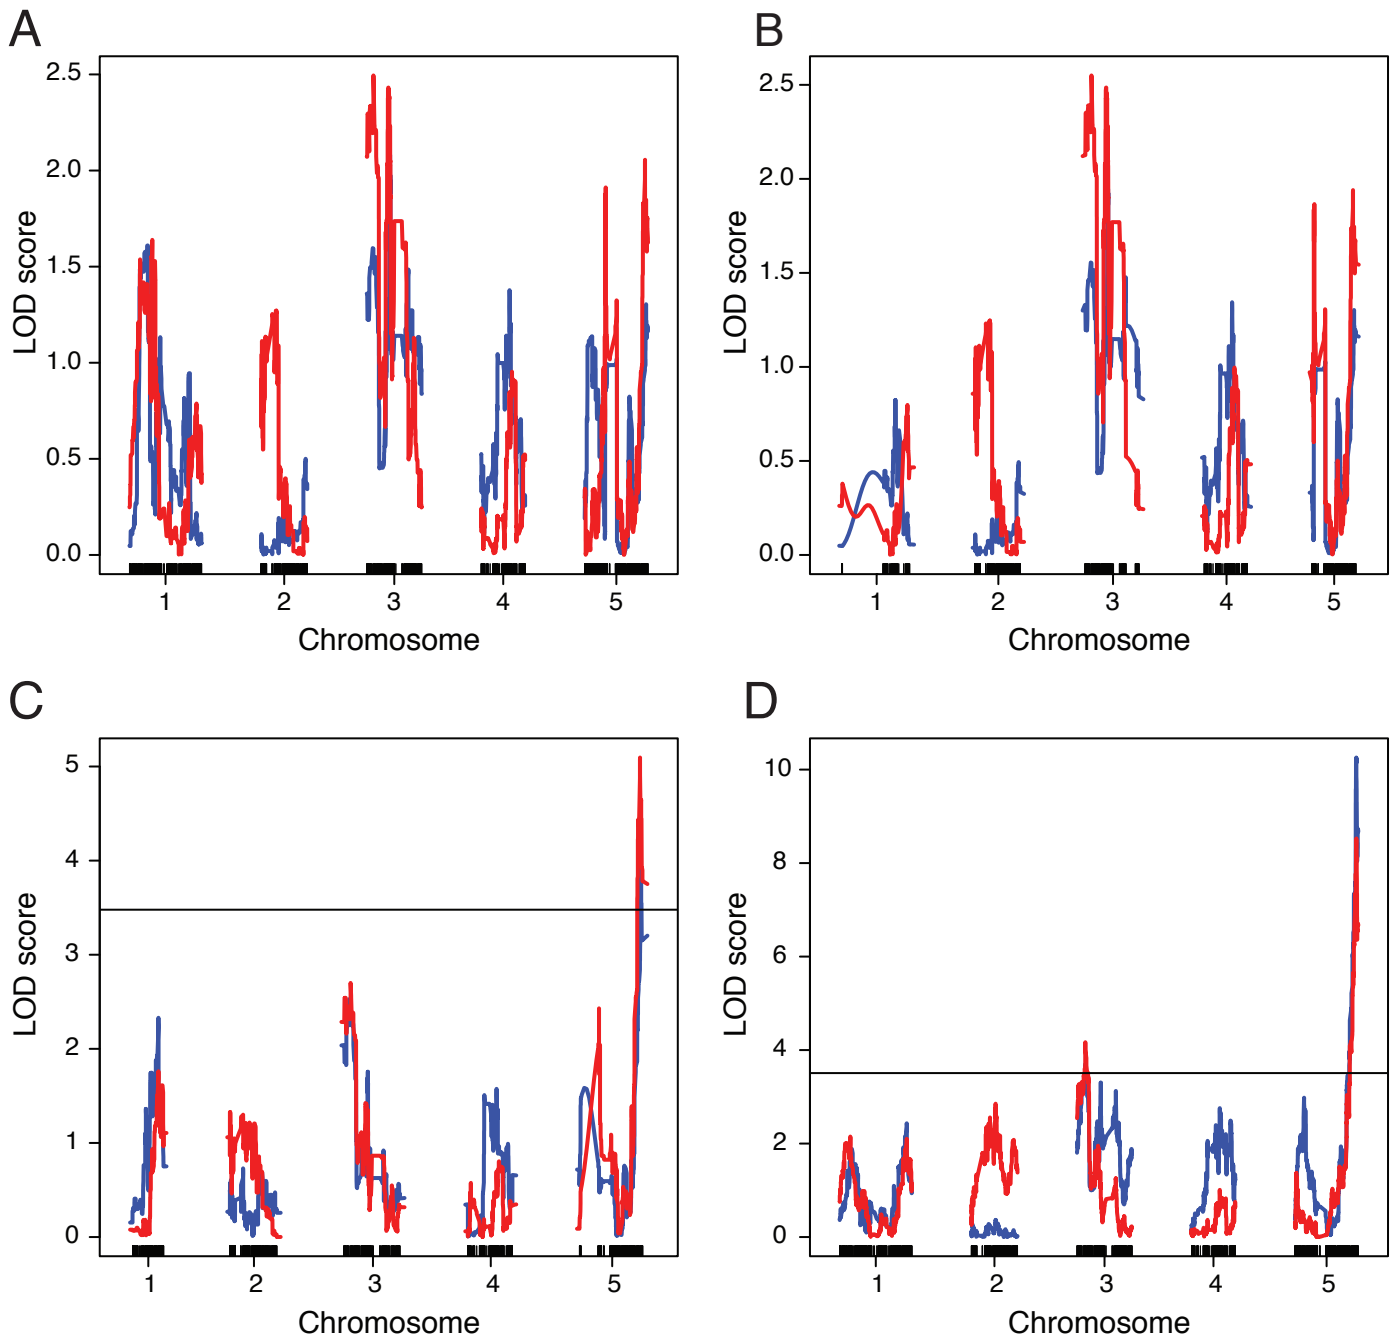

**Figure S18** Additional plots showing the results of QTL analyses for flowering time. QTL analyses of the number of days to flowering (blue) and rosette leaf number (red) for all individuals of the wt population (A), all individuals of the wild-type population after dropping distorted markers (B), the wild-type population with selected individuals and distorted markers dropped (C), and the combined wild-type and *recq4a* populations (D). Vertical ticks along the x-axis indicate the positions of the SNP markers genotyped. Horizontal lines indicate the position of the significance threshold for the population shown ( $p < 0.05$  for 1000 permutations). Absence of a horizontal line indicates that no LOD scores passed the threshold.

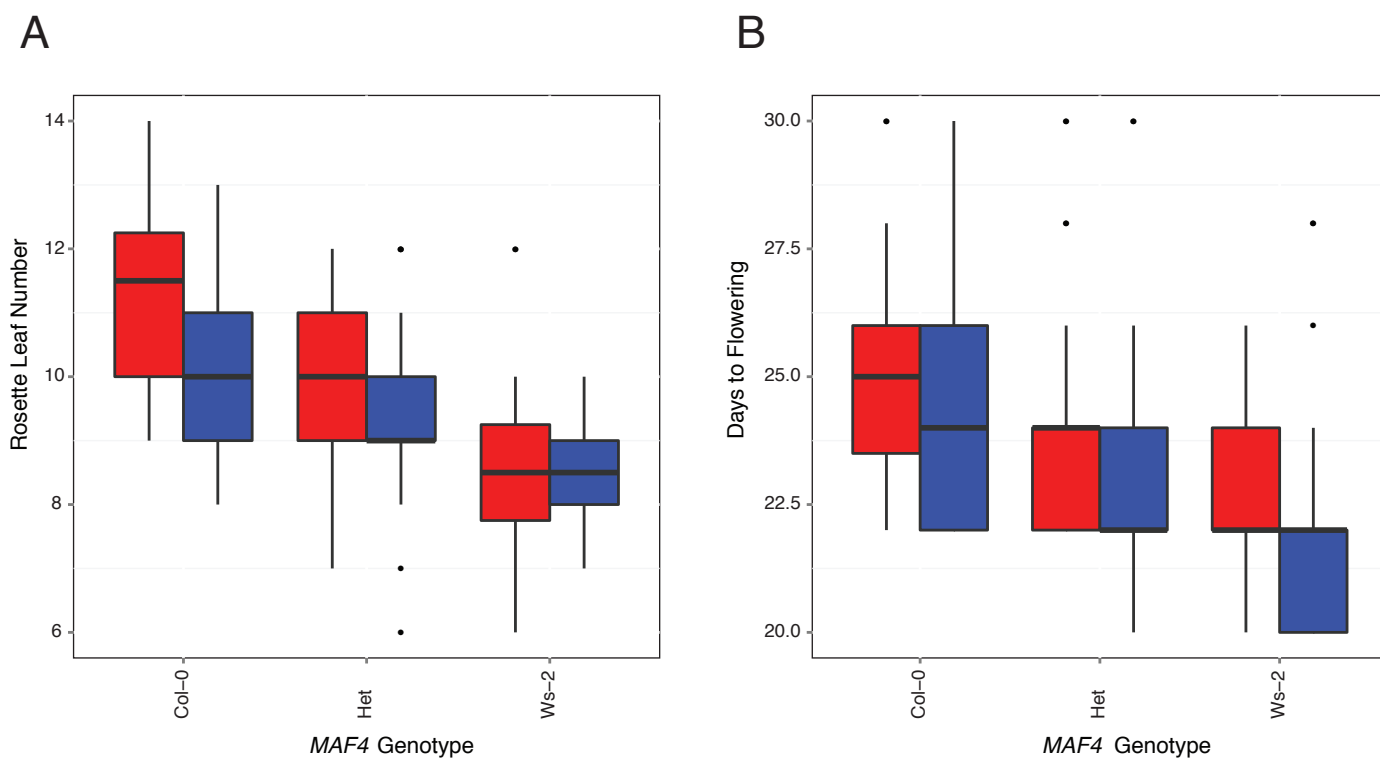

**Figure S19** Association between flowering time and *MAF4* genotype. Box plots showing the rosette leaf number (A) and the number of days until flowering (B) for wt and *recq4a* F2 individuals categorized by *MAF4* genotype. Phenotypes were scored when the inflorescence shoot reached the height of 1 cm.
