# Supplementary material for: Rapid and Inexpensive Whole-Genome Genotyping-by-Sequencing for Crossover Localization and Fine-Scale Genetic Mapping
Source: PubMed Central journal article supplement (PMC4349092; doi:10.1534/g3.114.016501), 2015-01-13
Supplement: supp_g3.114.016501_FigureS1.pdf [file supp_g3.114.016501_FigureS1.pdf]

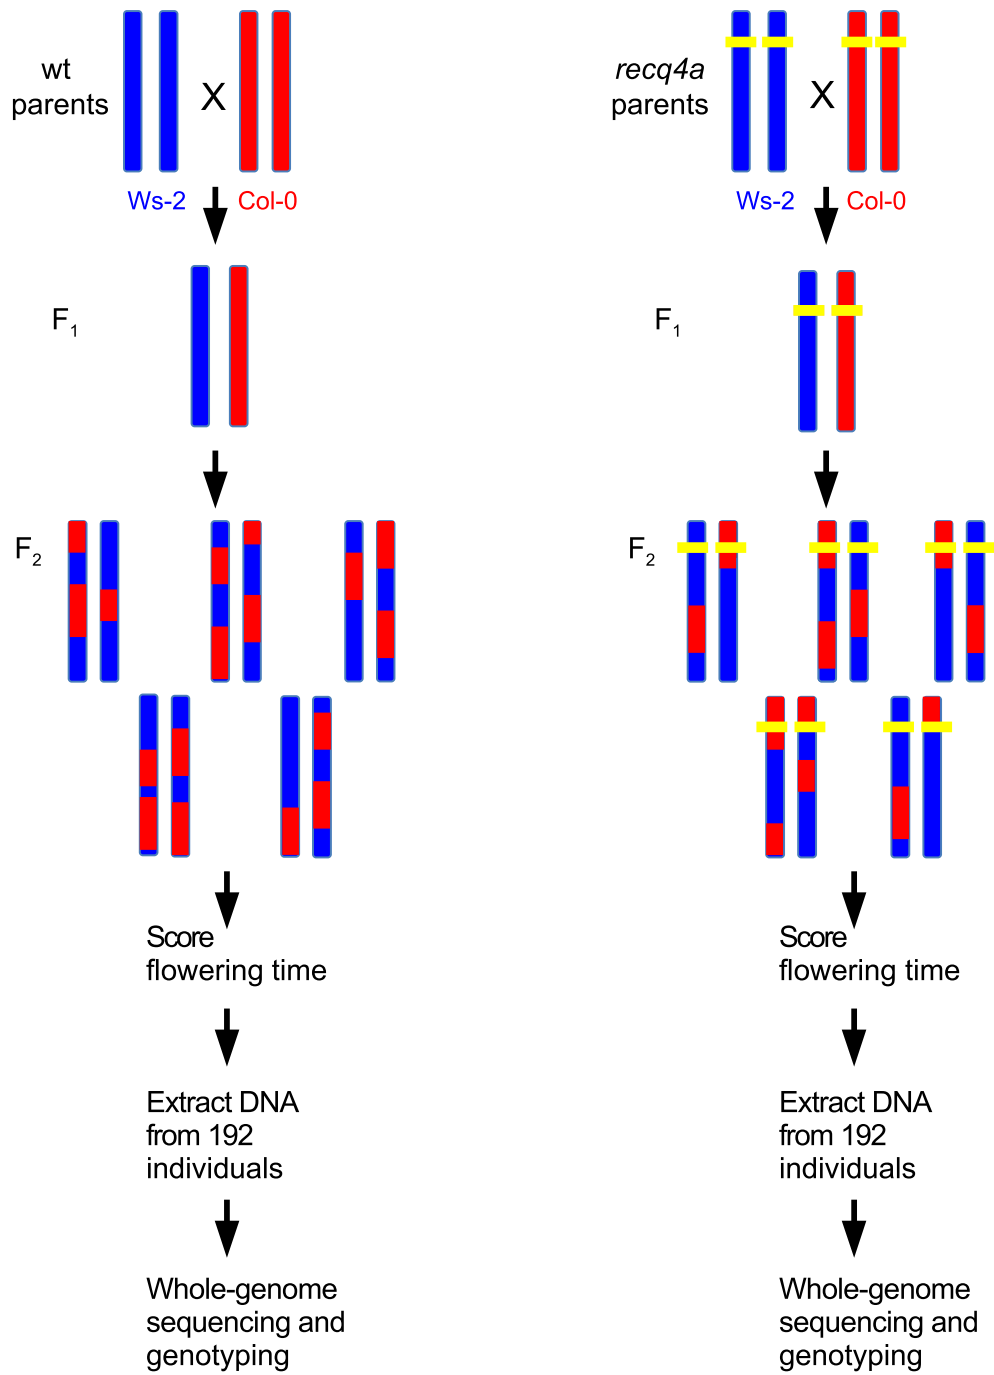

**Figure S1.** Crossing scheme and workflow for mapping flowering time QTL.
