# Supplementary material for: Rapid and Inexpensive Whole-Genome Genotyping-by-Sequencing for Crossover Localization and Fine-Scale Genetic Mapping
Source: PubMed Central journal article supplement (PMC4349092; doi:10.1534/g3.114.016501), 2015-01-13
Supplement: supp_g3.114.016501_FigureS2.pdf [file supp_g3.114.016501_FigureS2.pdf]

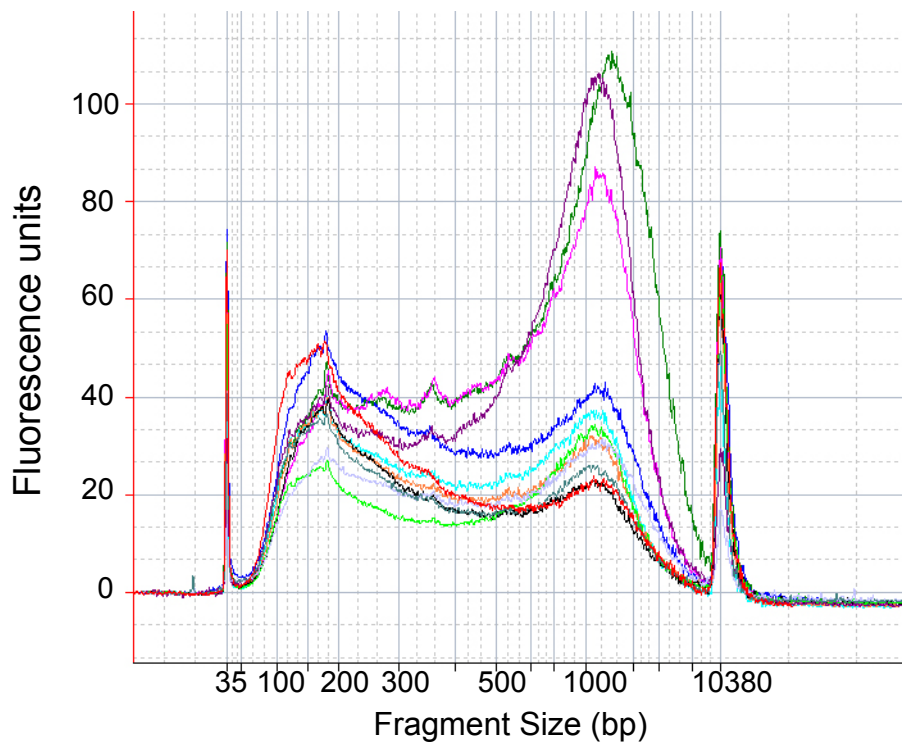

**Figure S2** Fragment size distribution of Shearase™-digested *Arabidopsis thaliana* DNA. Bioanalyzer traces of 11 DNA samples from one 96-plex library prep after digestion with the Shearase™ enzyme are shown.
