# Supplementary material for: Rapid and Inexpensive Whole-Genome Genotyping-by-Sequencing for Crossover Localization and Fine-Scale Genetic Mapping
Source: PubMed Central journal article supplement (PMC4349092; doi:10.1534/g3.114.016501), 2015-01-13
Supplement: supp_g3.114.016501_FigureS4.pdf [file supp_g3.114.016501_FigureS4.pdf]

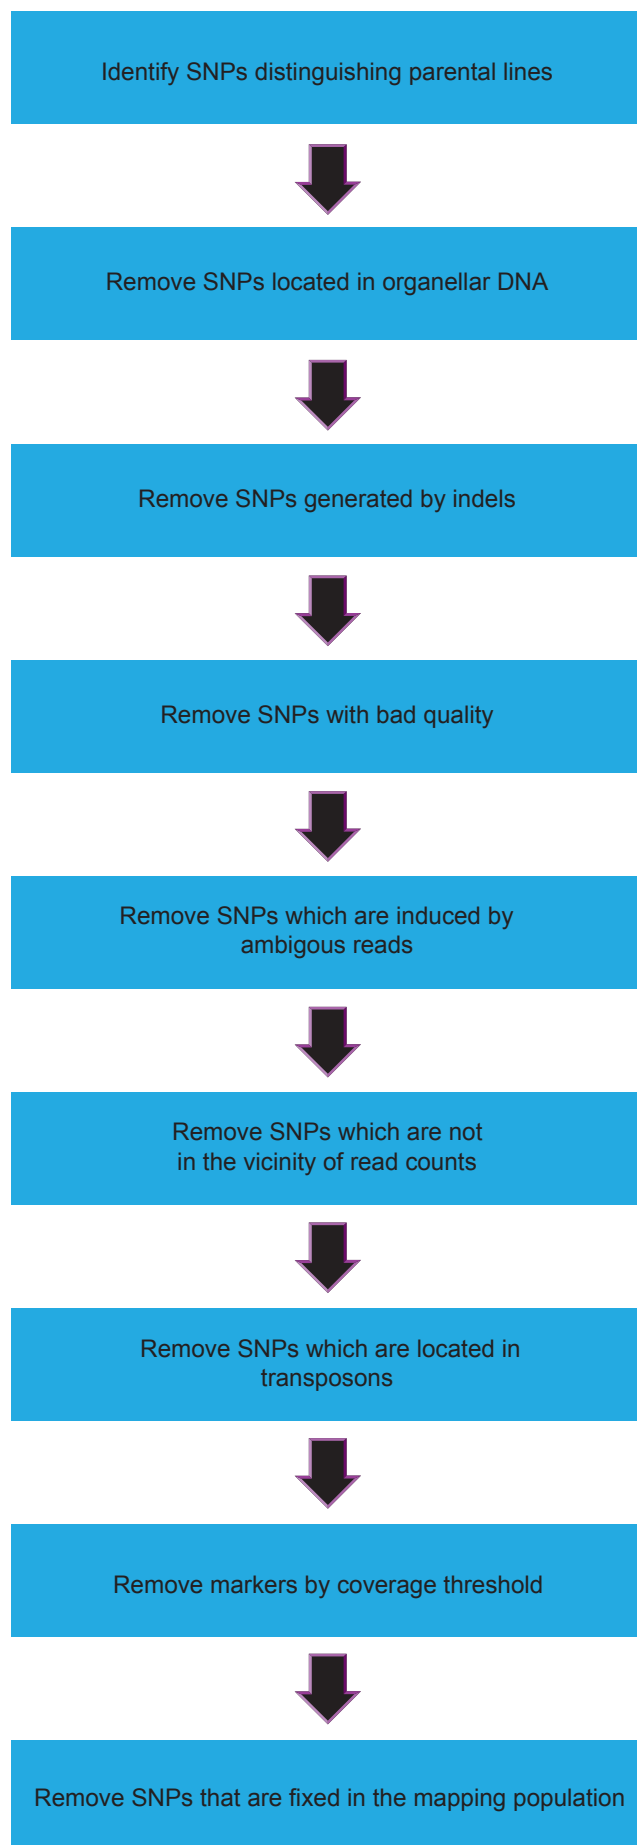

**Figure S4** Ws-2 marker filtering workflow. Stepwise representation of the marker filtering pipeline used to select SNPs for downstream implementation in TIGER.
