# Supplementary material for: Rapid and Inexpensive Whole-Genome Genotyping-by-Sequencing for Crossover Localization and Fine-Scale Genetic Mapping
Source: PubMed Central journal article supplement (PMC4349092; doi:10.1534/g3.114.016501), 2015-01-13
Supplement: supp_g3.114.016501_FigureS5.pdf [file supp_g3.114.016501_FigureS5.pdf]

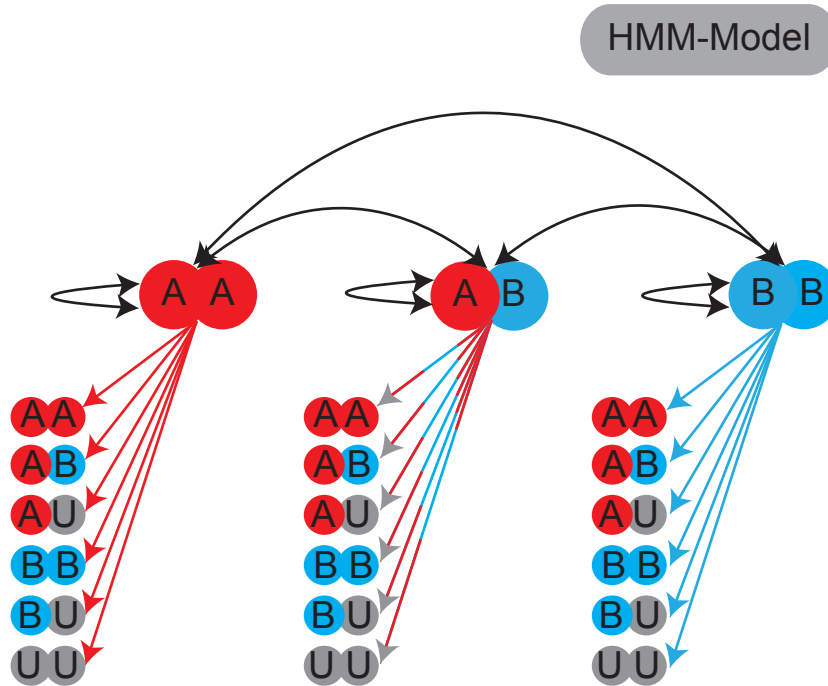

**Figure S5** Schematic representation of the HMM used in TIGER. Red indicates parent one, blue indicates parent two and grey indicates no information (unknown).
