# Supplementary material for: Rapid and Inexpensive Whole-Genome Genotyping-by-Sequencing for Crossover Localization and Fine-Scale Genetic Mapping
Source: PubMed Central journal article supplement (PMC4349092; doi:10.1534/g3.114.016501), 2015-01-13
Supplement: supp_g3.114.016501_FigureS7.pdf [file supp_g3.114.016501_FigureS7.pdf]

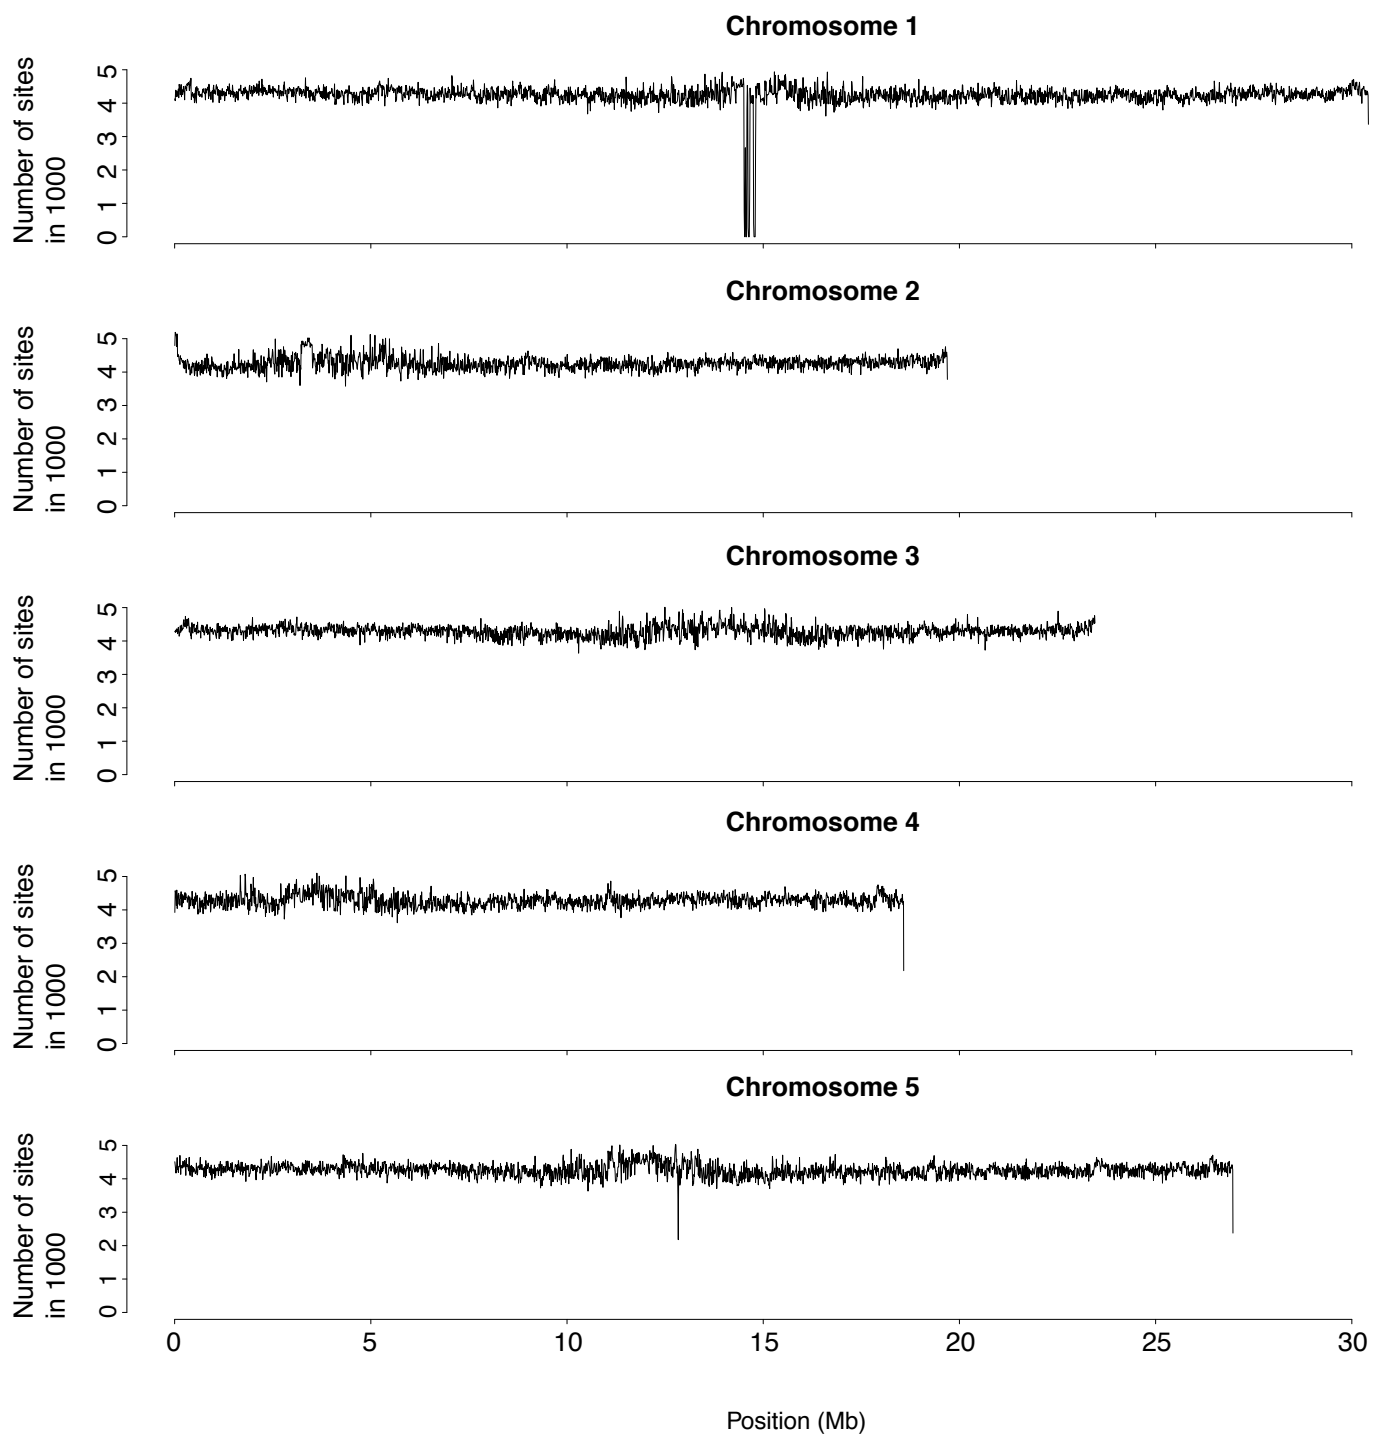

**Figure S7** Distribution of dsDNA Shearase™ cutting sites across the genome. The enzyme recognizes a site with the degenerate sequence 5' NVBN 3', where N = any base, V = any base except for T, and B = any base except for A. The frequency of recognition sites across the *A. thaliana* genome over a 10 kb sliding window is shown.
