# Supplementary material for: Rapid and Inexpensive Whole-Genome Genotyping-by-Sequencing for Crossover Localization and Fine-Scale Genetic Mapping
Source: PubMed Central journal article supplement (PMC4349092; doi:10.1534/g3.114.016501), 2015-01-13
Supplement: supp_g3.114.016501_FigureS8.pdf [file supp_g3.114.016501_FigureS8.pdf]

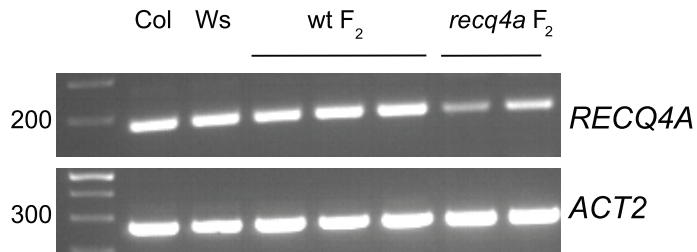

**Figure S8** Expression of *RECQ4A* transcripts in wt parents, wt F<sub>2</sub>, and *recq4a* F<sub>2</sub> individuals. All samples are mixed-stage flowers from a single individual. Numbers on the left indicate the size of the fragments (in base pairs). The *ACT2* gene was used as a control.
