# Supplementary material for: Rapid and Inexpensive Whole-Genome Genotyping-by-Sequencing for Crossover Localization and Fine-Scale Genetic Mapping
Source: PubMed Central journal article supplement (PMC4349092; doi:10.1534/g3.114.016501), 2015-01-13
Supplement: supp_g3.114.016501_FigureS13.pdf [file supp_g3.114.016501_FigureS13.pdf]

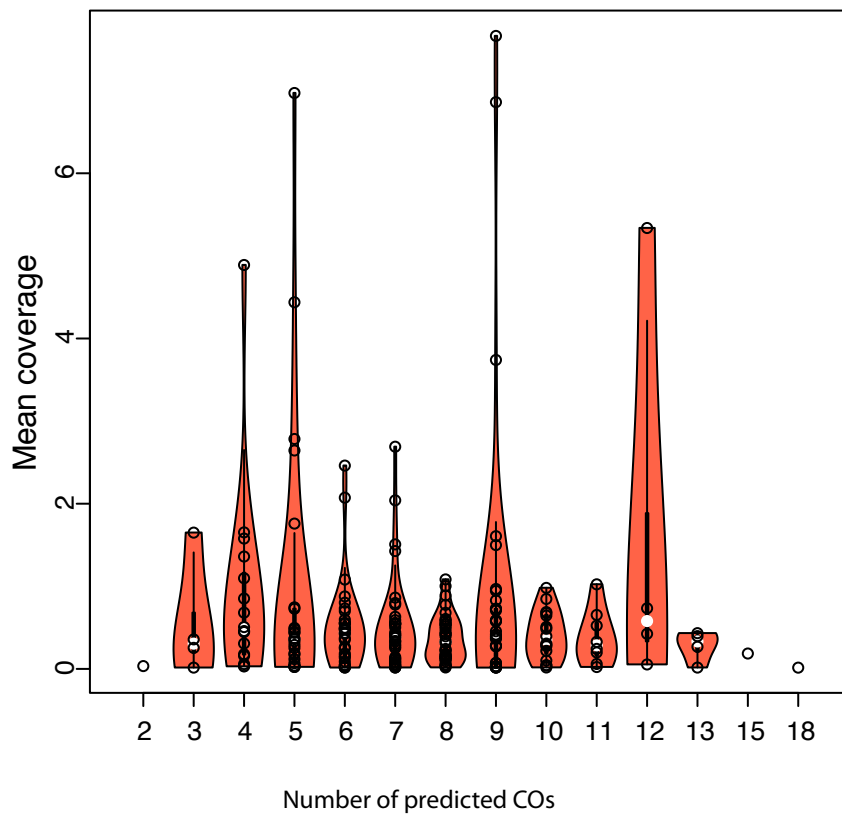

**Figure S13** The effect of coverage on CO prediction using TIGER. The density curve for probabilities (orange) is indicated for each number of predicted COs compared to the coverage rate.
