# Supplementary material for: Rapid and Inexpensive Whole-Genome Genotyping-by-Sequencing for Crossover Localization and Fine-Scale Genetic Mapping
Source: PubMed Central journal article supplement (PMC4349092; doi:10.1534/g3.114.016501), 2015-01-13
Supplement: supp_g3.114.016501_FigureS14.pdf [file supp_g3.114.016501_FigureS14.pdf]

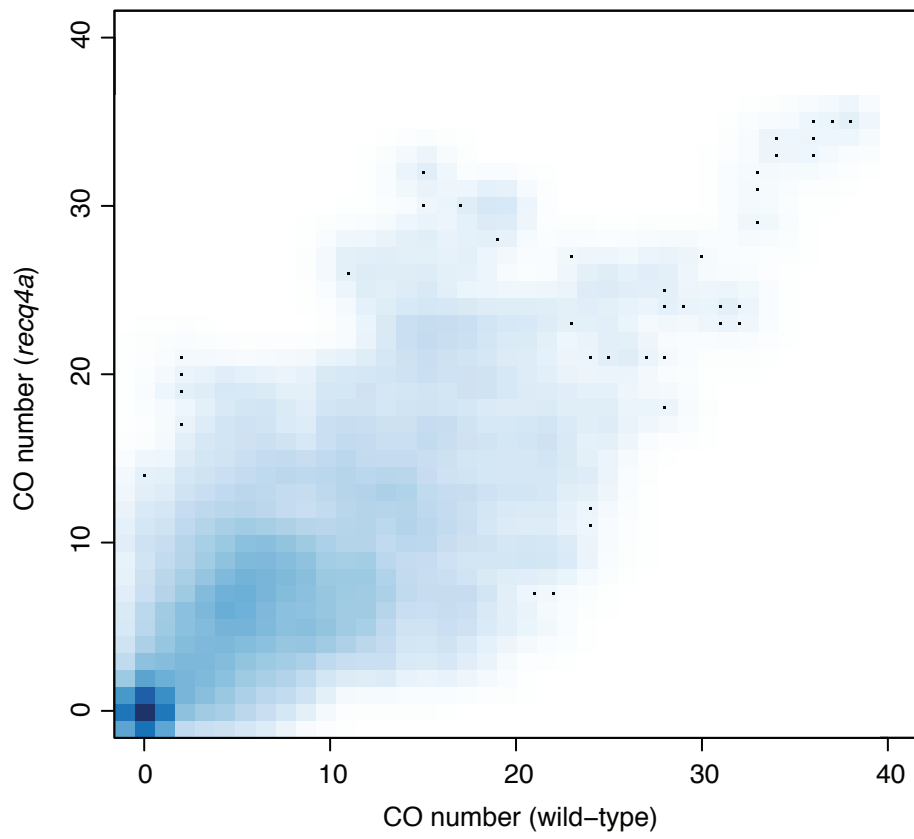

**Figure S14** Correlation between CO distributions throughout the genome between wild-type and *recq4a*  $F_2$  populations. Frequencies of 800-kb windows with the given numbers of COs are shown using a color scale from light (lowest) to dark (highest) blue.
