# Supplementary material for: Rapid and Inexpensive Whole-Genome Genotyping-by-Sequencing for Crossover Localization and Fine-Scale Genetic Mapping
Source: PubMed Central journal article supplement (PMC4349092; doi:10.1534/g3.114.016501), 2015-01-13
Supplement: supp_g3.114.016501_FigureS16.pdf [file supp_g3.114.016501_FigureS16.pdf]

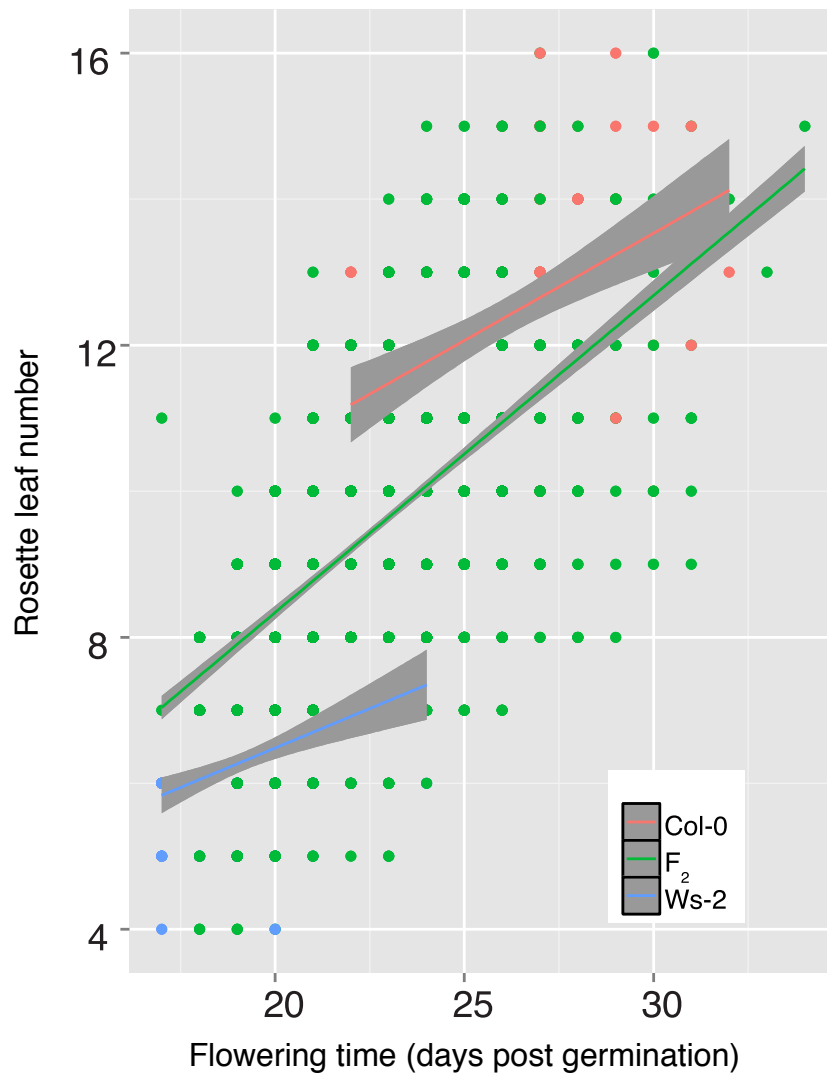

**Figure S16** Correlation between the number of days to flower and the number of rosette leaves at flowering.  $R^2 = 0.18, 0.3,$  and  $0.09$  for Col-0, F, and Ws-2, respectively.  $N=129, 2185,$  and  $202$  for Col-0, F<sub>2</sub>, and Ws-2, respectively. Equation of Col line:  $y = 0.29x + 4.7$   $R^2 = 0.18$ . Equation of F<sub>2</sub> line:  $y = 0.43x - 0.35$   $R^2 = 0.3$ . Equation of Ws-2 line:  $y = 0.22x + 2.3$   $R^2 = 0.09$ .
