# Supplementary material for: Rapid and Inexpensive Whole-Genome Genotyping-by-Sequencing for Crossover Localization and Fine-Scale Genetic Mapping
Source: PubMed Central journal article supplement (PMC4349092; doi:10.1534/g3.114.016501), 2015-01-13
Supplement: supp_g3.114.016501_FigureS17.pdf [file supp_g3.114.016501_FigureS17.pdf]

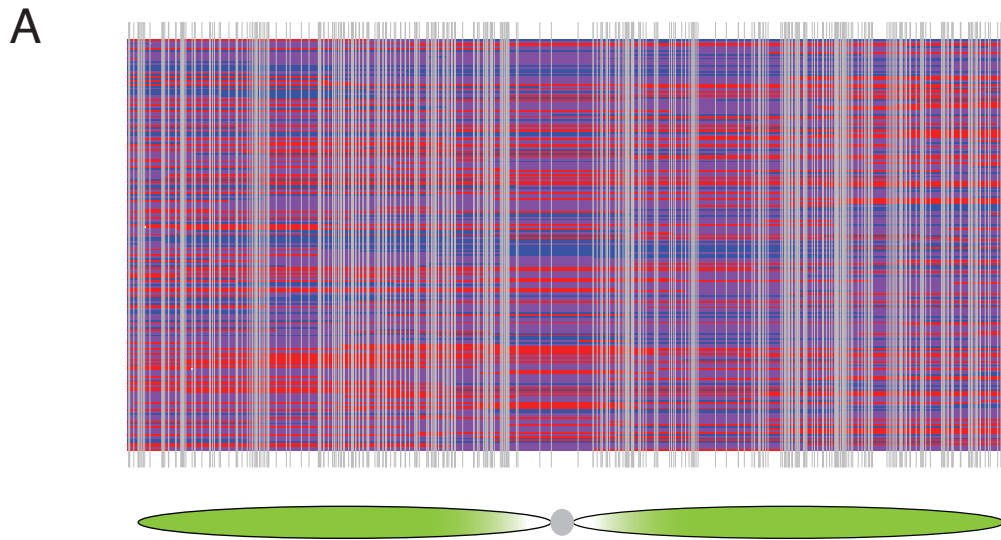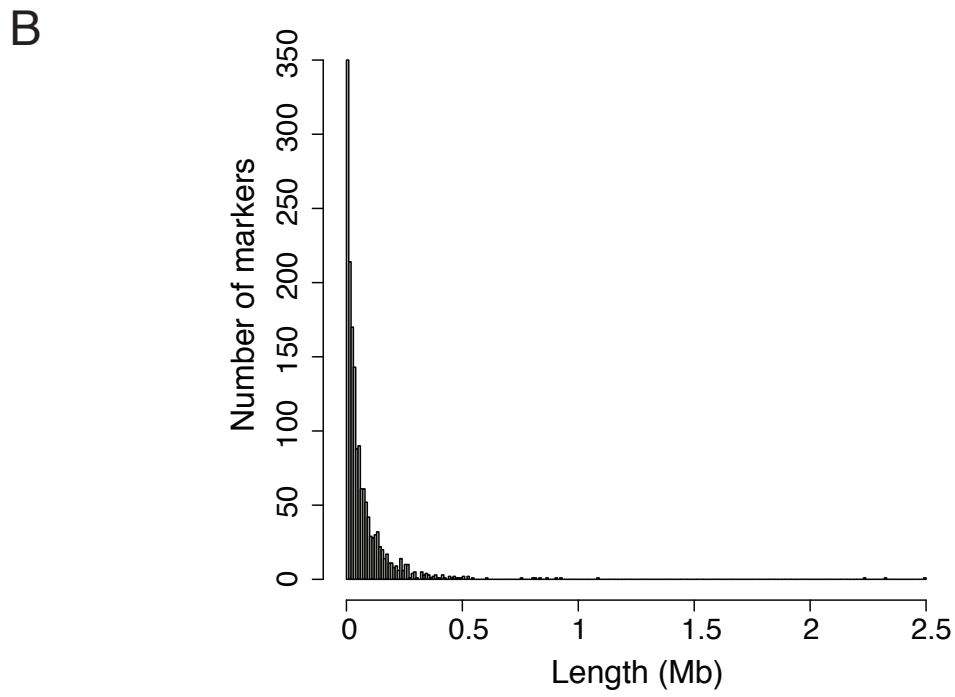

**Figure S17** Recombination blocks used as markers for QTL analysis. A) A graphical representation of the recombination block that were used as markers for QTL mapping of flowering time in wt and *recq4a*. Graphical reconstructions of the genotypes along chromosome 1 are shown. Each horizontal line represents a single individual. Red indicates homozygous for Col-0, blue depicts homozygous for Ws-2 and heterozygous regions are in purple. The thin grey lines indicate the positions where at least one individual had a CO. SNPs in the regions between lines were used as markers for QTL analysis. B) Length distributions of the recombination
