# Supplementary material for: Rapid and Inexpensive Whole-Genome Genotyping-by-Sequencing for Crossover Localization and Fine-Scale Genetic Mapping
Source: PubMed Central journal article supplement (PMC4349092; doi:10.1534/g3.114.016501), 2015-01-13
Supplement: supp_g3.114.016501_FigureS19.pdf [file supp_g3.114.016501_FigureS19.pdf]

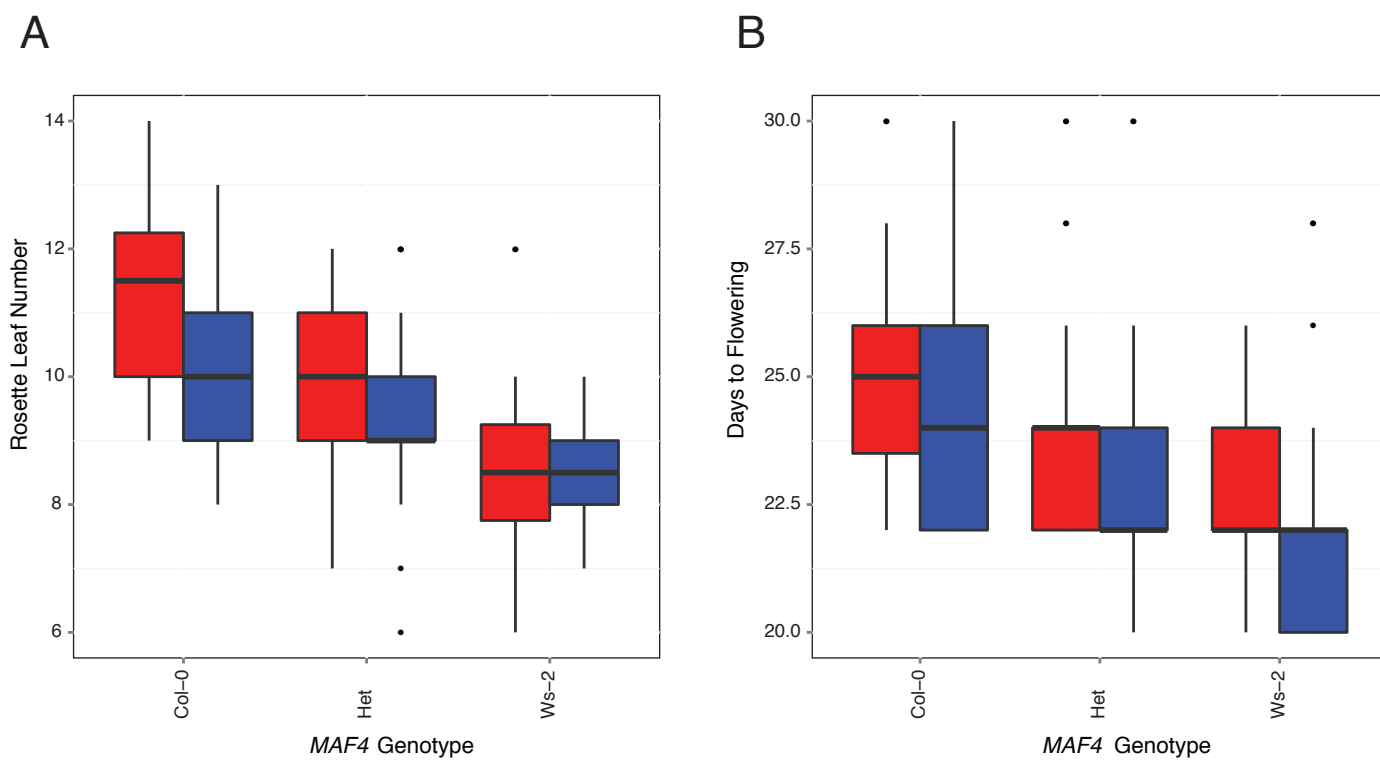

**Figure S19** Association between flowering time and *MAF4* genotype. Box plots showing the rosette leaf number (A) and the number of days until flowering (B) for wt and *recq4a* F2 individuals categorized by *MAF4* genotype. Phenotypes were scored when the inflorescence shoot reached the height of 1 cm.
