# Supplementary material for: Rapid and Inexpensive Whole-Genome Genotyping-by-Sequencing for Crossover Localization and Fine-Scale Genetic Mapping
Source: PubMed Central journal article supplement (PMC4349092; doi:10.1534/g3.114.016501), 2015-01-13
Supplement: supp_g3.114.016501_TableS1.pdf [file supp_g3.114.016501_TableS1.pdf]

**Table S1 Adapter index sequences.**

| Index Number | Sequence | Index Number | Sequence | Index Number | Sequence | Index Number | Sequence |
|--------------|----------|--------------|----------|--------------|----------|--------------|----------|
| 1            | ACGTAGCT | 25           | AGATCGCA | 49           | GATAGACA | 73           | AATGTTGC |
| 2            | TACGTCAG | 26           | AGCAGGAA | 50           | GCCACATA | 74           | ACACGACC |
| 3            | CGTCGATA | 27           | AGTCACTA | 51           | GCGAGTAA | 75           | ACAGATTC |
| 4            | GTAAGTGC | 28           | ATCCTGTA | 52           | GCTAACGA | 76           | AGATGTAC |
| 5            | AACGTGAT | 29           | ATTGAGGA | 53           | GCTCGGTA | 77           | AGCACCTC |
| 6            | CGCTGATC | 30           | CAACCACA | 54           | GGAGAACA | 78           | AGCCATGC |
| 7            | CAGATCTG | 31           | CAAGACTA | 55           | GGTGCGAA | 79           | AGGCTAAC |
| 8            | ATGCCTAA | 32           | CAATGGAA | 56           | GTACGCAA | 80           | ATAGCGAC |
| 9            | CTGTAGCC | 33           | CACTTCGA | 57           | GTCGTAGA | 81           | ATCATTCC |
| 10           | AGTACAAG | 34           | CAGCGTTA | 58           | GTCTGTCA | 82           | ATTGGCTC |
| 11           | CATCAAGT | 35           | CATACCAA | 59           | GTGTTCTA | 83           | CAAGGAGC |
| 12           | AGTGGTCA | 36           | CCAGTTCA | 60           | TAGGATGA | 84           | CACCTTAC |
| 13           | AACAACCA | 37           | CCGAAGTA | 61           | TATCAGCA | 85           | CCATCCTC |
| 14           | AACCGAGA | 38           | CCGTGAGA | 62           | TCCGTCTA | 86           | CCGACAAC |
| 15           | AACGCTTA | 39           | CCTCCTGA | 63           | TCTTCACA | 87           | CCTAATCC |
| 16           | AAGACGGA | 40           | CGAAGTTA | 64           | TGAAGAGA | 88           | CCTCTATC |
| 17           | AAGGTACA | 41           | CGACTGGA | 65           | TGGAACAA | 89           | CGACACAC |
| 18           | ACACAGAA | 42           | CGCATACA | 66           | TGGCTTCA | 90           | CGGATTGC |
| 19           | ACAGCAGA | 43           | CTCAATGA | 67           | TGGTGGTA | 91           | CTAAGGTC |
| 20           | ACCTCCAA | 44           | CTGAGCCA | 68           | TTCACGCA | 92           | GAACAGGC |
| 21           | ACGCTCGA | 45           | CTGGCATA | 69           | AACTCACC | 93           | GACAGTGC |
| 22           | ACGTATCA | 46           | GAATCTGA | 70           | AAGAGATC | 94           | GAGTTAGC |
| 23           | ACTATGCA | 47           | GACTAGTA | 71           | AAGGACAC | 95           | GATGAATC |
| 24           | AGAGTCAA | 48           | GAGCTGAA | 72           | AATCCGTC | 96           | GCCAAGAC |

Sequences 1-4 were designed in house. Sequences 5 – 96 were taken from Mamanova et al. 2010.
