# Supplementary material for: Rapid and Inexpensive Whole-Genome Genotyping-by-Sequencing for Crossover Localization and Fine-Scale Genetic Mapping
Source: PubMed Central journal article supplement (PMC4349092; doi:10.1534/g3.114.016501), 2015-01-13
Supplement: supp_g3.114.016501_TableS2.pdf [file supp_g3.114.016501_TableS2.pdf]

**Table S2 Primers used for PCR amplification and Sanger sequencing reactions**

|                              | <b>Sequence (5' to 3')</b> | <b>CAPS enzyme</b> | <b>Allele cut</b> |
|------------------------------|----------------------------|--------------------|-------------------|
| <i>MAF Genotyping</i>        |                            |                    |                   |
| forward                      | ACTTCGTTCTTCACTACCGGT      | Styl               | Ws-2              |
| reverse                      | GTTCTCCTCTCTCAGCAGCT       | Styl               | Ws-2              |
| <i>Ws-2 Inversion</i>        |                            |                    |                   |
| Primer 1                     | TGGCCTGCGTCTAAACAATG       |                    |                   |
| Primer 2                     | CCATCAATCTCAATTCACAAGGG    |                    |                   |
| Primer 3                     | ATGACCAGACCACTTTCCGG       |                    |                   |
| Primer 4                     | GACGTCGAGGCTGATAATTGA      |                    |                   |
| Primer 5                     | CGGGAAAGGACTGCTGAACT       |                    |                   |
| Primer 6                     | AACAGCAAAGCCACCATCAC       |                    |                   |
| C2 forward                   | TGGTCCGGTGGTGATTTACA       |                    |                   |
| C2 reverse                   | CGGCTTCTCGAGTTACTCT        |                    |                   |
| <i>Breakpoint resolution</i> |                            |                    |                   |
| ID1 forward                  | GATGTTACCGTGGGTCGATT       |                    |                   |
| ID1 reverse                  | GTCTTCAACTTCCGGCGATA       |                    |                   |
| ID2 forward                  | CTTTGGCCGATAGACAGGAG       |                    |                   |
| ID2 reverse                  | TCAGCCACCACCACTACAAA       |                    |                   |
| ID3 forward                  | GCAGAAGATTCCGAGAGTGG       |                    |                   |
| ID3 reverse                  | TGGTCTTGGTCCGAAAATGT       |                    |                   |
| ID4 forward                  | TTCCCAATTTGATCCAGAG        |                    |                   |
| ID4 reverse                  | CAGGCGGAGGAGTGTAAGAG       |                    |                   |
| ID5 forward                  | CCCGCCAAAATAAACAAAGA       |                    |                   |
| ID5 reverse                  | CACGAAGTTTCTCGGCTTTC       |                    |                   |
| ID6 forward                  | TGAACAGACAATTTGCTCCAA      |                    |                   |
| ID6 reverse                  | AGGCCAACGTTTAGGAGGAT       |                    |                   |
| ID7 forward                  | TTCCCTGCATCCTAGTCCTG       |                    |                   |
| ID7 reverse                  | AAAAGGAATGGCACACGTTT       |                    |                   |
| ID8 forward                  | CCGTCAATTTGAGCAGGAAT       |                    |                   |
| ID8 reverse                  | TTCTACGCACACCAGGGATT       |                    |                   |
| ID9 forward                  | GCGTAATCATCACTCGCTCA       |                    |                   |
| ID9 reverse                  | TGCAAACACGGAAGACAGTT       |                    |                   |
| ID10 forward                 | GCCATGCGTACCTGAAAAGT       |                    |                   |
| ID10 reverse                 | ATTGGCATCACGAGGAAAAGT      |                    |                   |
| ID11 forward                 | CAATTAACAAGGCCGAGTAAAGA    |                    |                   |
| ID11 reverse                 | GGAATCTCCCTTGGTCCCTA       |                    |                   |
