# Supplementary material for: Rapid and Inexpensive Whole-Genome Genotyping-by-Sequencing for Crossover Localization and Fine-Scale Genetic Mapping
Source: PubMed Central journal article supplement (PMC4349092; doi:10.1534/g3.114.016501), 2015-01-13
Supplement: supp_g3.114.016501_TableS3.pdf [file supp_g3.114.016501_TableS3.pdf]

**Table S3 Price comparison for individual components and reagents needed for paired-end library preparation**

Our Method

|                                         | Manufacturer         | Part number | Price per package | Samples per package | Price per sample |
|-----------------------------------------|----------------------|-------------|-------------------|---------------------|------------------|
| <b>DNA fragmentation</b>                |                      |             |                   |                     |                  |
| dsDNA Shearase™                         | Zymo Research        | E2018-200   | 396               | 400                 | 0.99             |
| <b>A-tailing</b>                        |                      |             |                   |                     |                  |
| Klenow exo-dATP                         | New England Biolabs  | M0212L      | 236               | 400                 | 0.59             |
|                                         | New England Biolabs  | N0440S      | 48                | 5000                | 0.01             |
| <b>Adapter Ligation</b>                 |                      |             |                   |                     |                  |
| Custom adapter oligos                   | Sigma-Aldrich        | NA          | 3840              | 576000              | 0.01             |
| P2 adapter oligos                       | Sigma-Aldrich        | NA          | 40                | 6000                | 0.01             |
| Quick Ligation Kit™                     | New England Biolabs  | M2200L      | 388               | 300                 | 1.29             |
| NEB Buffer 2                            | New England Biolabs  | B7002S      | 18                | 384                 | 0.05             |
| <b>PCR Enrichment</b>                   |                      |             |                   |                     |                  |
| Phusion Mastermix                       | New England Biolabs  | M0531S      | 170               | 9600                | 0.02             |
| Primer oligos                           | Sigma-Aldrich        | NA          | 47                | 28800000            | 0.000002         |
| <b>TOTAL for Reagents</b>               |                      |             |                   |                     | <b>2.96</b>      |
| <b>Clean-ups</b>                        |                      |             |                   |                     |                  |
| AmpPure XP Magnetic Beads               | Beckman-Coulter      | A63881      | 1126              | 508                 | 2.22             |
| <b>TOTAL for Library prep</b>           |                      |             |                   |                     | <b>5.18</b>      |
| <b>Validation</b>                       |                      |             |                   |                     |                  |
| Qubit DNA quantification reagents       | Life Technologies    | Q32851      | 79                | 9600                | 0.01             |
| Bioanalyzer reagents                    | Agilent Technologies | 5067-1505   | 349               | 28800               | 0.01             |
| <b>TOTAL for Preparation/Validation</b> |                      |             |                   |                     | <b>5.20</b>      |
| <b>Pre-Library Prep Quantification</b>  |                      |             |                   |                     |                  |
| Qubit DNA quantification reagents       | Life Technologies    | Q32851      | 79                | 100                 | 0.79             |
| <b>TOTAL for all</b>                    |                      |             |                   |                     | <b>5.99</b>      |

## Illumina Tru-Seq Nano

|                                         | Manufacturer         | Part number | Price per package | Samples per package | Price per sample |
|-----------------------------------------|----------------------|-------------|-------------------|---------------------|------------------|
| <b>DNA Fragmentation</b>                |                      |             |                   |                     |                  |
|                                         | Covaris              | 520045      | 125               | 25                  | 5                |
| <b>Library Prep</b>                     |                      |             |                   |                     |                  |
| TruSeq Nano                             | Illumina             | FC-121-4003 | 2880              | 96                  | 30               |
| <b>TOTAL for Library prep</b>           |                      |             |                   |                     | <b>35</b>        |
| <b>Validation</b>                       |                      |             |                   |                     |                  |
| Qubit DNA quantification reagents       | Life Technologies    | Q32851      | 79                | 9600                | 0.01             |
| Bioanalyzer reagents                    | Agilent Technologies | 5067-1505   | 349               | 28800               | 0.01             |
| <b>TOTAL for Preparation/Validation</b> |                      |             |                   |                     | <b>35.02</b>     |
| <b>Pre-Library prep Quantification</b>  |                      |             |                   |                     |                  |
| Qubit DNA quantification reagents       | Life Technologies    | Q32851      | 79                | 100                 | 0.79             |
| <b>TOTAL for all</b>                    |                      |             |                   |                     | <b>35.81</b>     |

Prices are based on the list price for the US market (in US dollars). The reagents needed for library quantification for normalization purposes, plastic consumables such as 96-well PCR plates, and general laboratory reagents are not included, as they are not included in the Illumina TruSeq kit.
