# Supplementary material for: Rapid and Inexpensive Whole-Genome Genotyping-by-Sequencing for Crossover Localization and Fine-Scale Genetic Mapping
Source: PubMed Central journal article supplement (PMC4349092; doi:10.1534/g3.114.016501), 2015-01-13
Supplement: supp_g3.114.016501_TableS4.pdf [file supp_g3.114.016501_TableS4.pdf]

**Table S4. Genotype frequencies in wt and *recq4a* F<sub>2</sub> populations**

|               | <b>Col-0</b> | <b>Ws-2</b> | <b>Het</b> |
|---------------|--------------|-------------|------------|
| wt            | 28.0%        | 21.8%       | 50.2%      |
| <i>recq4a</i> | 23.8%        | 25.6%       | 50.7%      |
