# Supplementary material for: Rapid and Inexpensive Whole-Genome Genotyping-by-Sequencing for Crossover Localization and Fine-Scale Genetic Mapping
Source: PubMed Central journal article supplement (PMC4349092; doi:10.1534/g3.114.016501), 2015-01-13
Supplement: supp_g3.114.016501_TableS5.pdf [file supp_g3.114.016501_TableS5.pdf]

**Table S5 Summary of flowering time statistics for parental and F<sub>2</sub> populations**

| <b>Background</b> | <b>Genotype</b> | <b>N</b> | <b>Mean Days to Flowering ( ± sem)</b> | <b>Mean Rosette Leaf Number ( ± sem)</b> |
|-------------------|-----------------|----------|----------------------------------------|------------------------------------------|
| Col-0             | wt              | 64       | 27.19 ( ± 0.18)                        | 13.34 ( ± 0.19)                          |
| Col-0             | <i>recq4a</i>   | 65       | 24.92 ( ± 0.32)                        | 11.4 ( ± 0.14)                           |
| F <sub>2</sub>    | wt              | 1133     | 23.07 ( ± 0.07)                        | 9.66 ( ± 0.05)                           |
| F <sub>2</sub>    | <i>recq4a</i>   | 1052     | 21.95 ( ± 0.07)                        | 9.23 ( ± 0.06)                           |
| Ws-2              | wt              | 66       | 19.65( ± 0.16)                         | 6.72 ( ± 0.14)                           |
| Ws-2              | <i>recq4a</i>   | 136      | 18.96 ( ± 0.11)                        | 6.1 ( ± 0.07)                            |

Phenotypes were scored when the inflorescence shoot reached the height of 1 cm. Abbreviations used: SD, standard deviation; sem, standard error of the mean.
