# Supplementary material for: Rapid and Inexpensive Whole-Genome Genotyping-by-Sequencing for Crossover Localization and Fine-Scale Genetic Mapping
Source: PubMed Central journal article supplement (PMC4349092; doi:10.1534/g3.114.016501), 2015-01-13
Supplement: supp_g3.114.016501_TableS6.pdf [file supp_g3.114.016501_TableS6.pdf]

**Table S6 Additional statistics for QTL analyses of flowering time**

|                     | <b>Position (Mb)</b> | <b>LOD</b> | <b>Variance explained (%)</b> |
|---------------------|----------------------|------------|-------------------------------|
| <i>wt</i>           |                      |            |                               |
| Rosette Leaf Number | 25.55                | 5.09       | 20.7                          |
| Days to Flower      | 25.99                | 3.92       | 16.4                          |
| <i>recq4a</i>       |                      |            |                               |
| Rosette Leaf Number | 26.02                | 8.73       | 24.6                          |
| Days to Flower      | 25.86                | 9.55       | 23.7                          |
| Combined            |                      |            |                               |
| Rosette Leaf Number | 26.02                | 8.52       | 16.7                          |
| Days to Flower      | 25.99                | 10.25      | 19.5                          |
