# Supplementary material for: Rapid and Inexpensive Whole-Genome Genotyping-by-Sequencing for Crossover Localization and Fine-Scale Genetic Mapping
Source: PubMed Central journal article supplement (PMC4349092; doi:10.1534/g3.114.016501), 2015-01-13
Supplement: supp_g3.114.016501_TableS7.pdf [file supp_g3.114.016501_TableS7.pdf]

**Table S7** Flowering time as a function of *MAF4* and *RECQ4A* genotypes

|                                      | DF | Sum of Squares | Mean Squares | F value | P-value |
|--------------------------------------|----|----------------|--------------|---------|---------|
| <b>Days to Flowering</b>             |    |                |              |         |         |
| <i>MAF4</i> Genotype                 | 2  | 78.7           | 39.4         | 8.6     | 2.8e-4  |
| <i>RECQ4A</i> genotype               | 1  | 16.3           | 16.3         | 3.6     | 0.06    |
| <i>RECQ4A</i> x <i>MAF4</i> Genotype | 2  | 0.8            | 0.4          | 0.09    | 0.92    |
| <b>Rosette Leaf Number</b>           |    |                |              |         |         |
| <i>RECQ4A</i> genotype               | 2  | 91.7           | 45.8         | 26.5    | 9e-11   |
| <i>MAF4</i> Genotype                 | 1  | 19.5           | 19.5         | 11.3    | 1e-3    |
| <i>RECQ4A</i> x <i>MAF4</i> Genotype | 2  | 6.8            | 3.4          | 1.95    | 0.15    |

Flowering time phenotypes were scored among F<sub>2</sub> individuals from the wt and *recq4a* populations that had been genotyped at the *MAF4* locus. Shown are the results of an analysis of variance (ANOVA). See Table S5 for summary statistics of the phenotypic data.
